# Supplementary material for: Polymerase pausing induced by sequence-specific RNA-binding protein drives heterochromatin assembly
Source: PubMed Central journal article supplement (PMC6075038; doi:10.1101/gad.310136.117), 2018-07-01
Supplement: supp_32.13-14.953_Supplemental_Fig_S1.pdf [file supp_32.13-14.953_Supplemental_Fig_S1.pdf]

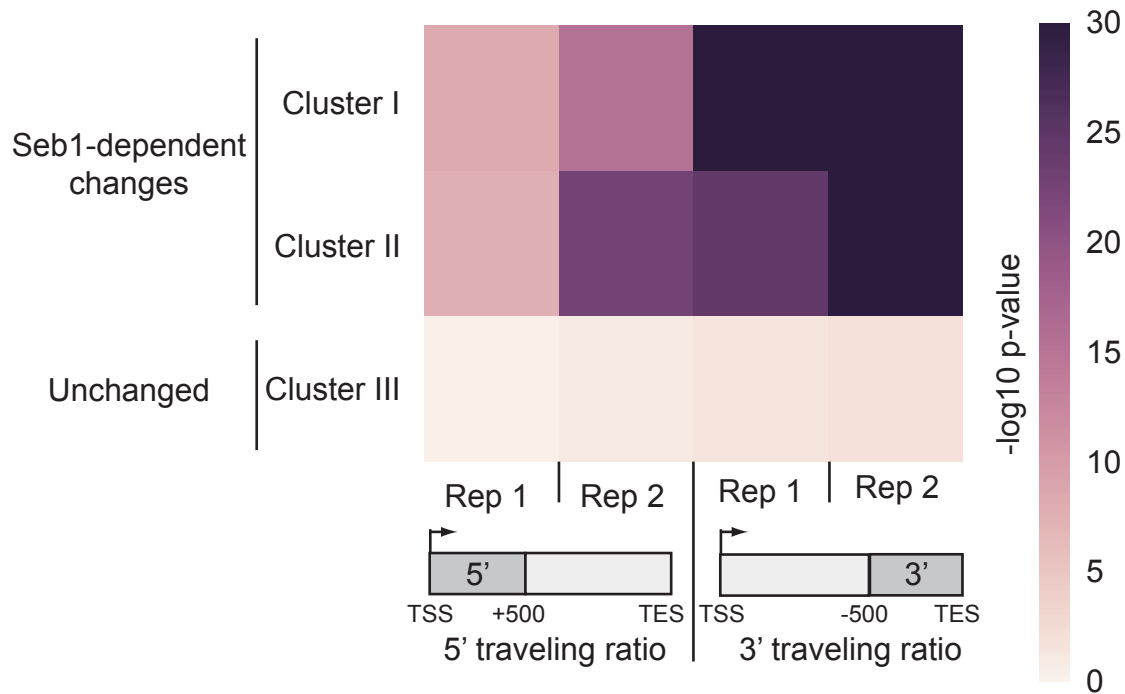

**Supplemental Figure S1. *seb1-1* mutant displays statistically significant changes in 5' and 3' RNAPII traveling ratios.** Heat map of  $-\log_{10}$  p-values of KS tests comparing *clr4* $\Delta$  to *clr4* $\Delta$  *seb1-1* traveling ratios from each set of clusters in (Figure 1D). Clusters I and II display significant Seb1-dependent changes. Each replicate is represented (Rep 1 and Rep 2) for both 5' and 3' traveling ratios.
