# Supplementary material for: Polymerase pausing induced by sequence-specific RNA-binding protein drives heterochromatin assembly
Source: PubMed Central journal article supplement (PMC6075038; doi:10.1101/gad.310136.117), 2018-07-01
Supplement: supp_32.13-14.953_Supplemental_Fig_S3.pdf [file supp_32.13-14.953_Supplemental_Fig_S3.pdf]

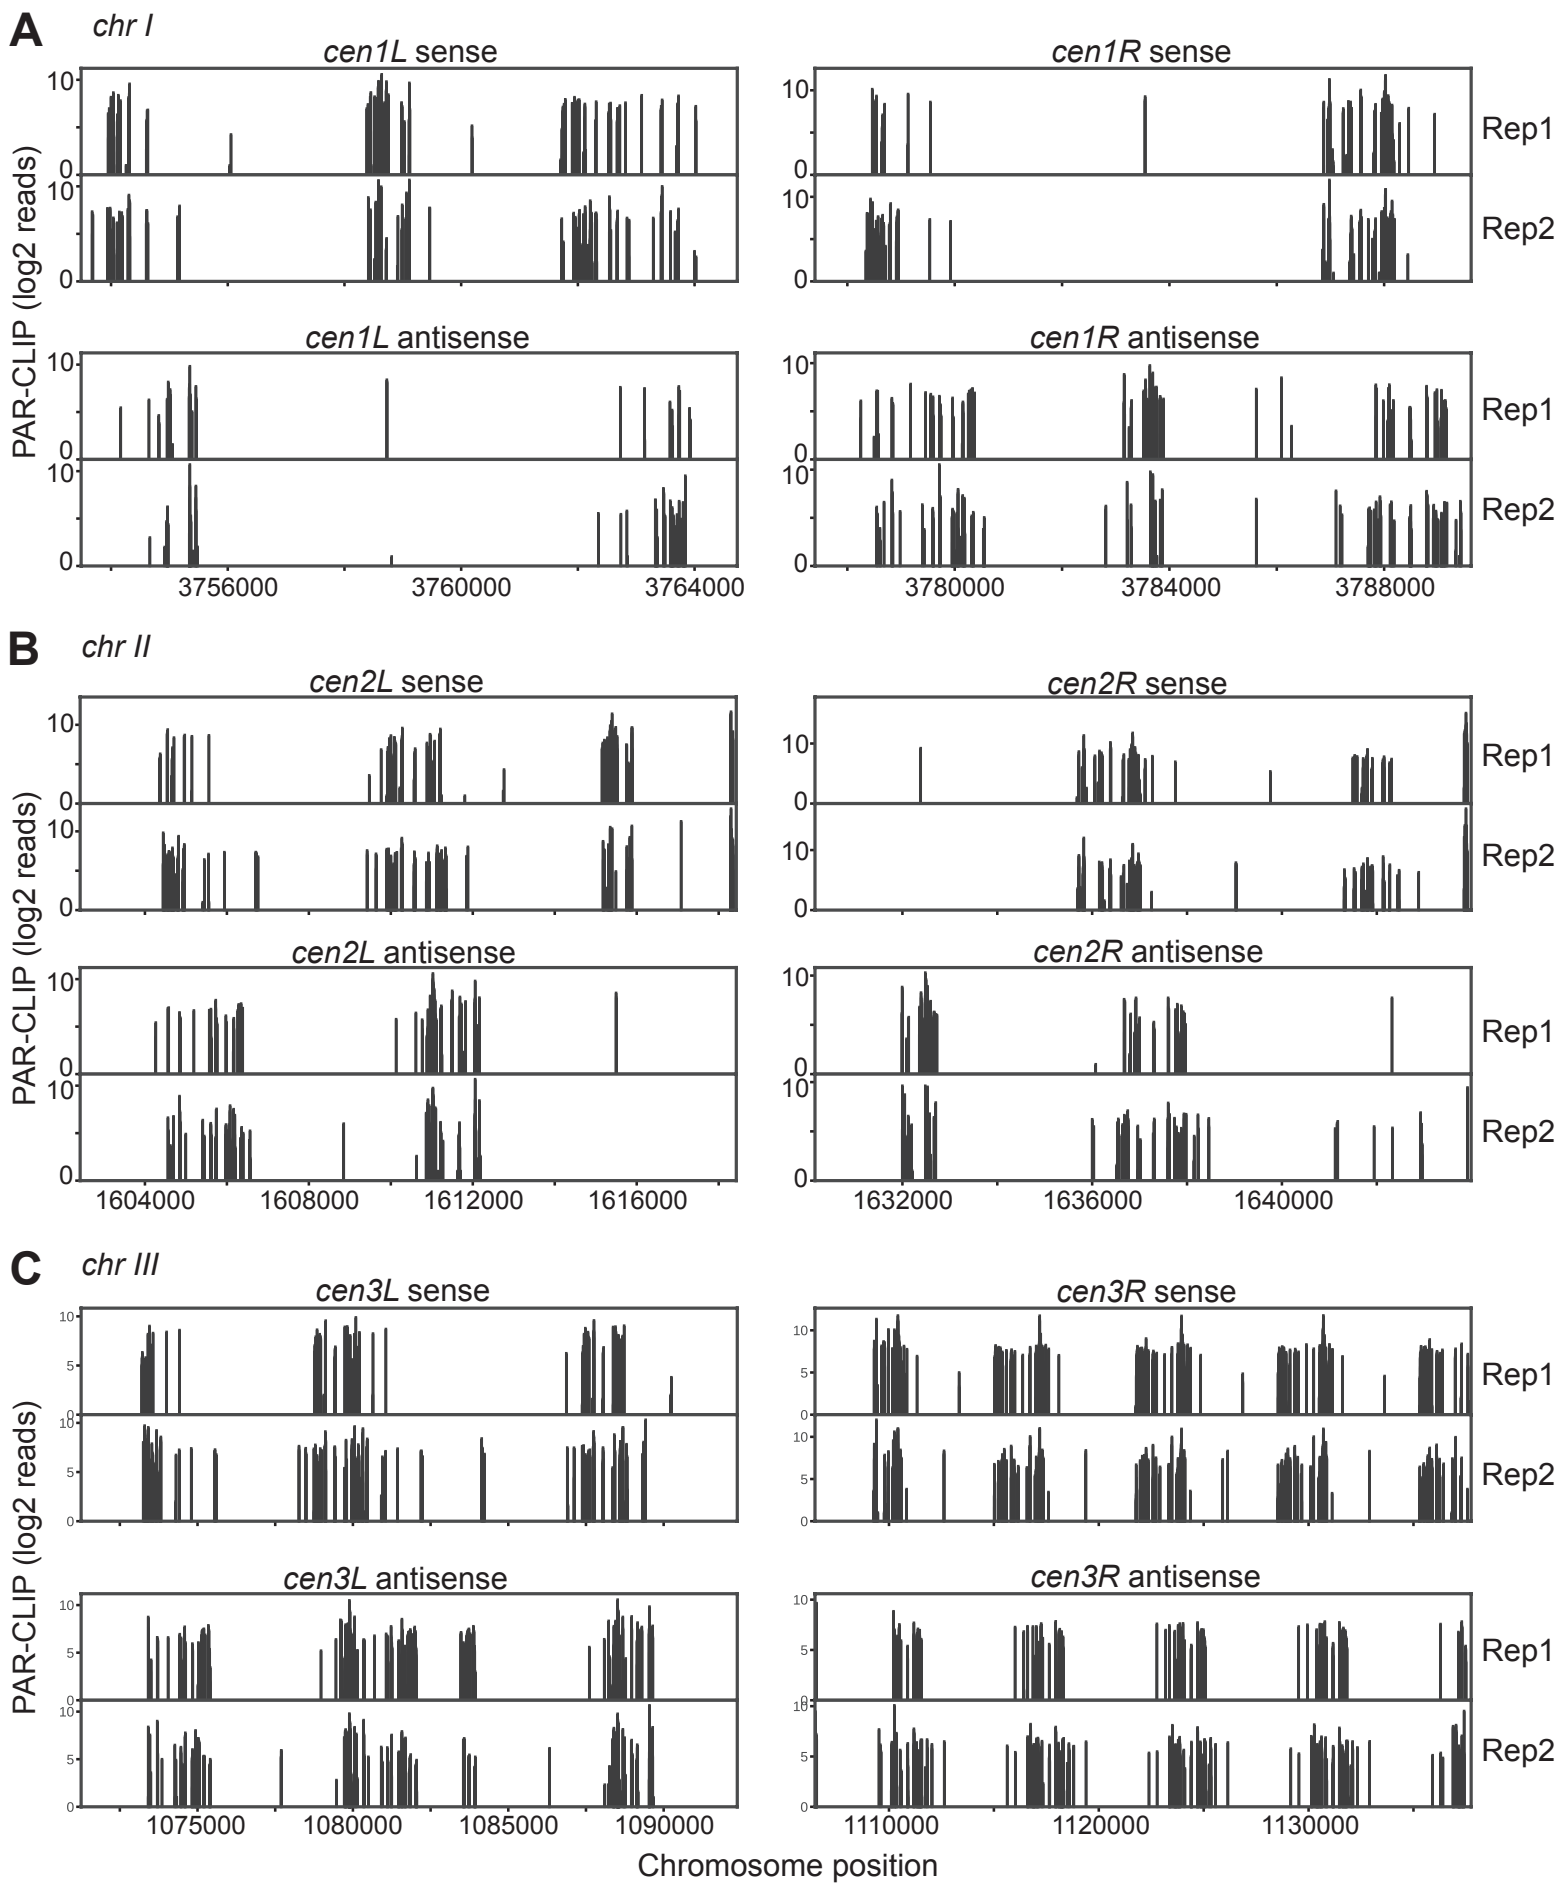

**Supplemental Figure S3. PAR-CLIP analysis of Seb1 at all three centromeres. A-C)** Seb1 PAR-CLIP clusters are present at centromeres 1 (**A**), 2 (**B**) and 3 (**C**). Centromere left (cenL) and right (cenR) arms are depicted for two replicates (Rep 1 and Rep 2) in both sense and antisense orientations.
