# Supplementary material for: Polymerase pausing induced by sequence-specific RNA-binding protein drives heterochromatin assembly
Source: PubMed Central journal article supplement (PMC6075038; doi:10.1101/gad.310136.117), 2018-07-01
Supplement: supp_32.13-14.953_Supplemental_Fig_S4.pdf [file supp_32.13-14.953_Supplemental_Fig_S4.pdf]

Supplemental Figure S4.

Parsa\_Supplemental\_FigS4

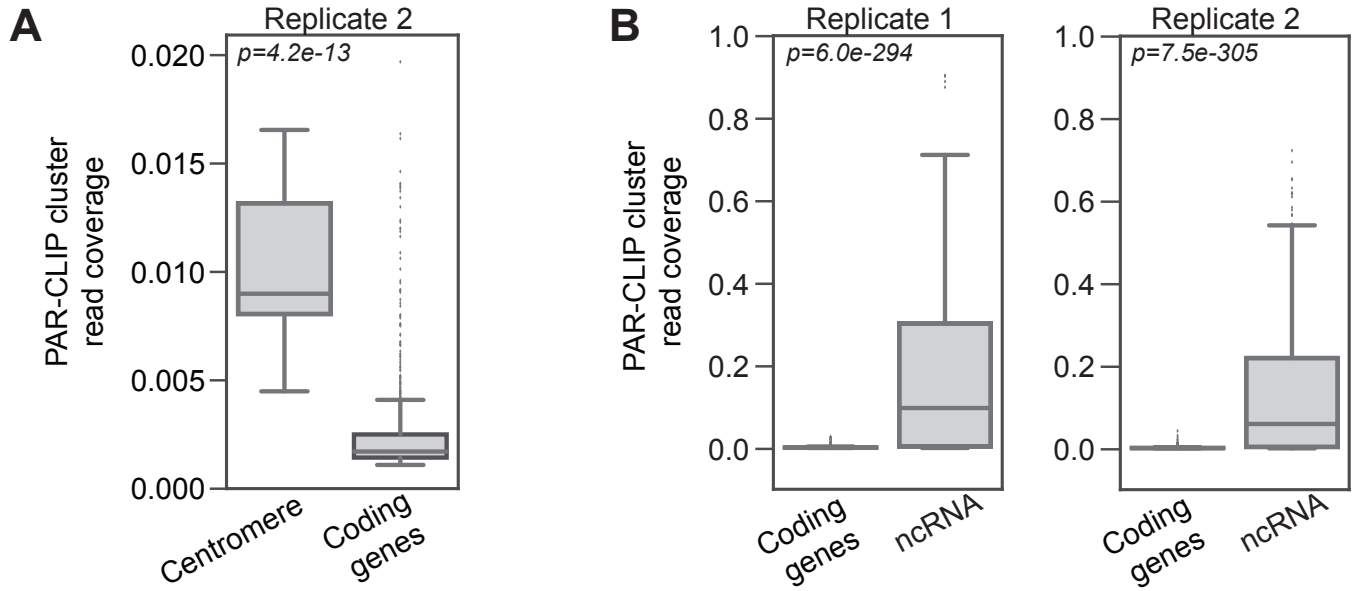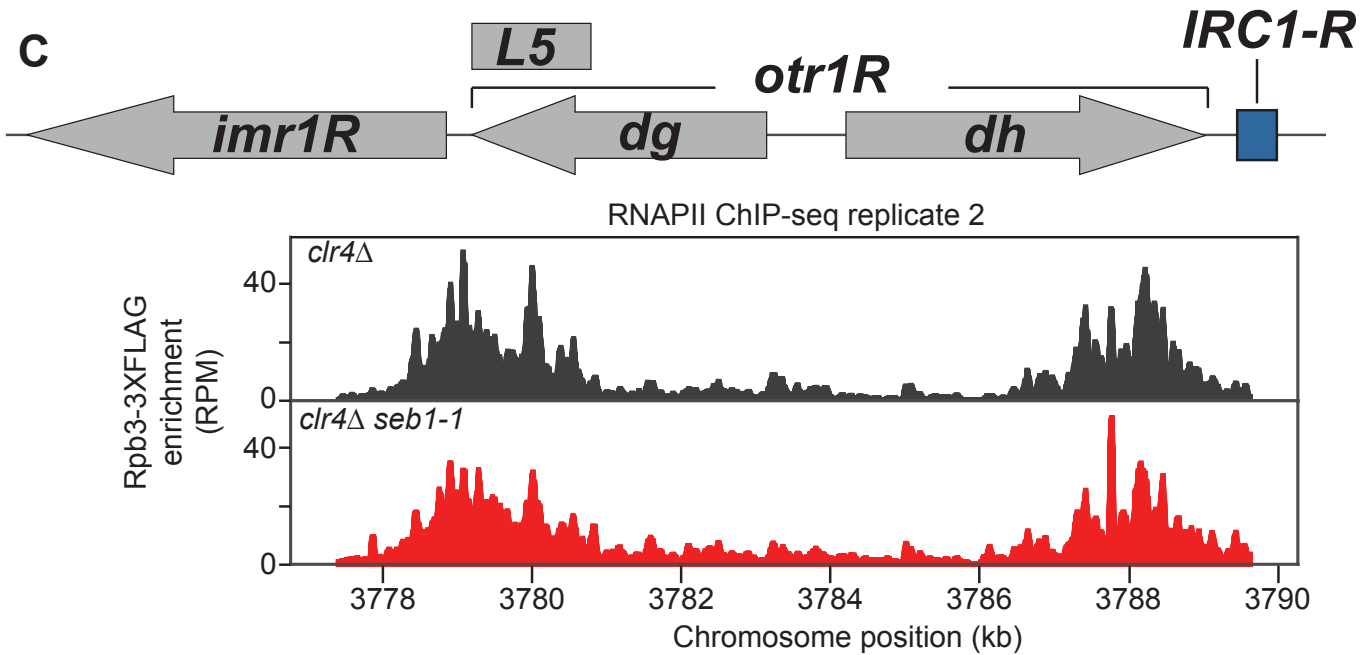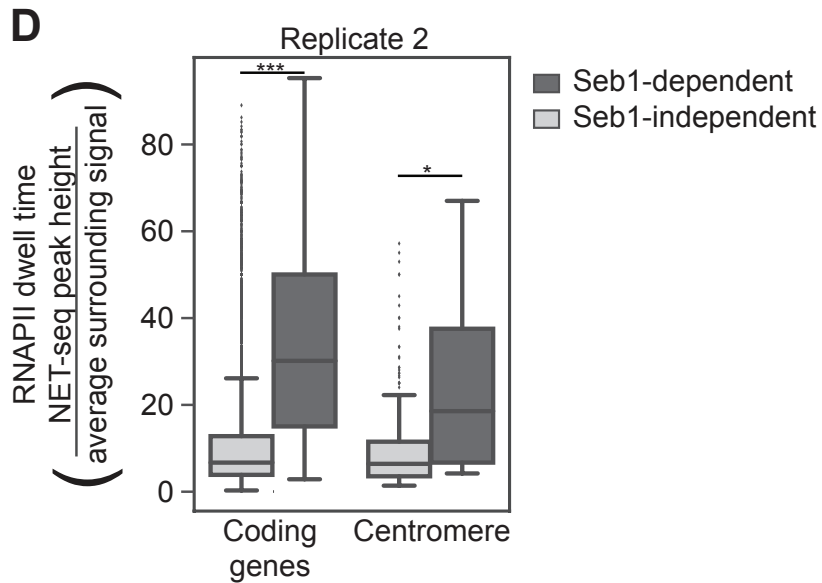

**Supplemental Figure S4. Seb1 induces RNAPII pauses with long dwell times throughout the genome. A)** Seb1 PAR-CLIP cluster read coverage at the centromeres compared to coding genes for the second replicate. **B)** Seb1 PAR-CLIP cluster read coverage at ncRNAs (including sn/snoRNAs, tRNAs) compared to coding genes. **C)** Replicate 2 data for RNAPII levels based on ChIP-seq of Rpb3-3xFLAG with reads aligned to the right arm of centromere 1. Comparing RNAPII enrichment in *clr4* $\Delta$  (black) and *clr4* $\Delta$  *seb1-1* (red). **D)** RNAPII dwell time analysis for centromeres and coding genes in a second replicate (\* $p=0.026$ ; \*\*\* $p=1.8e-56$ ).
