# Supplementary material for: Polymerase pausing induced by sequence-specific RNA-binding protein drives heterochromatin assembly
Source: PubMed Central journal article supplement (PMC6075038; doi:10.1101/gad.310136.117), 2018-07-01
Supplement: supp_32.13-14.953_Supplemental_Fig_S5.pdf [file supp_32.13-14.953_Supplemental_Fig_S5.pdf]

Supplemental Figure S5.

Parsa\_Supplemental\_FigS5

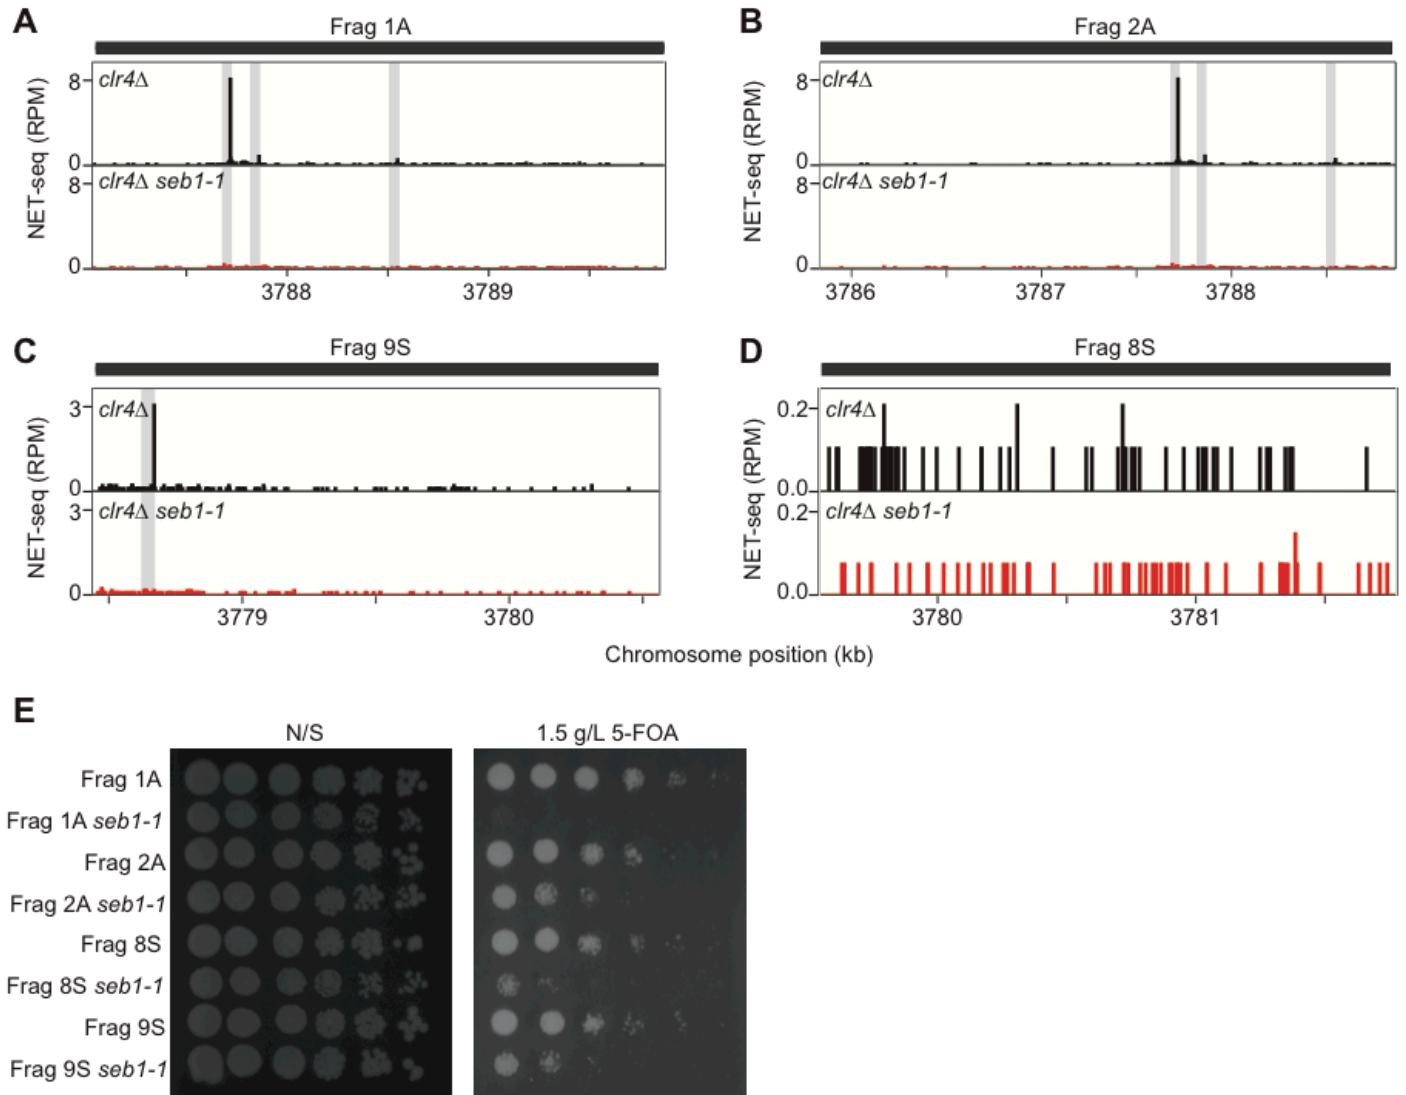

**Supplemental Figure S5. Polymerase pauses and heterochromatin formation within centromere fragments are *Seb1*-dependent. A-D) NET-seq read density (RPM) for *clr4Δ* (black) and *clr4Δ seb1-1* (red) aligned to the four fragments in **Figure 2H** that display a capacity to induce heterochromatin formation in the context of the reporter construct shown in **Figure 2G**. **A) Frag1A**; **B) Frag2A**; **C) Frag9S**; **D) Frag8S**. Grey bars represent locations of NET-seq peaks/RNAPII pause sites present in the *clr4Δ* strain. **E)** 5-FOA spotting assay for Fragments with or without the mutant *seb1-1* allele.**
