# Supplementary material for: Polymerase pausing induced by sequence-specific RNA-binding protein drives heterochromatin assembly
Source: PubMed Central journal article supplement (PMC6075038; doi:10.1101/gad.310136.117), 2018-07-01
Supplement: supp_32.13-14.953_Supplemental_Fig_S6.pdf [file supp_32.13-14.953_Supplemental_Fig_S6.pdf]

Supplemental Figure S6.

Parsa\_Supplemental\_FigS6

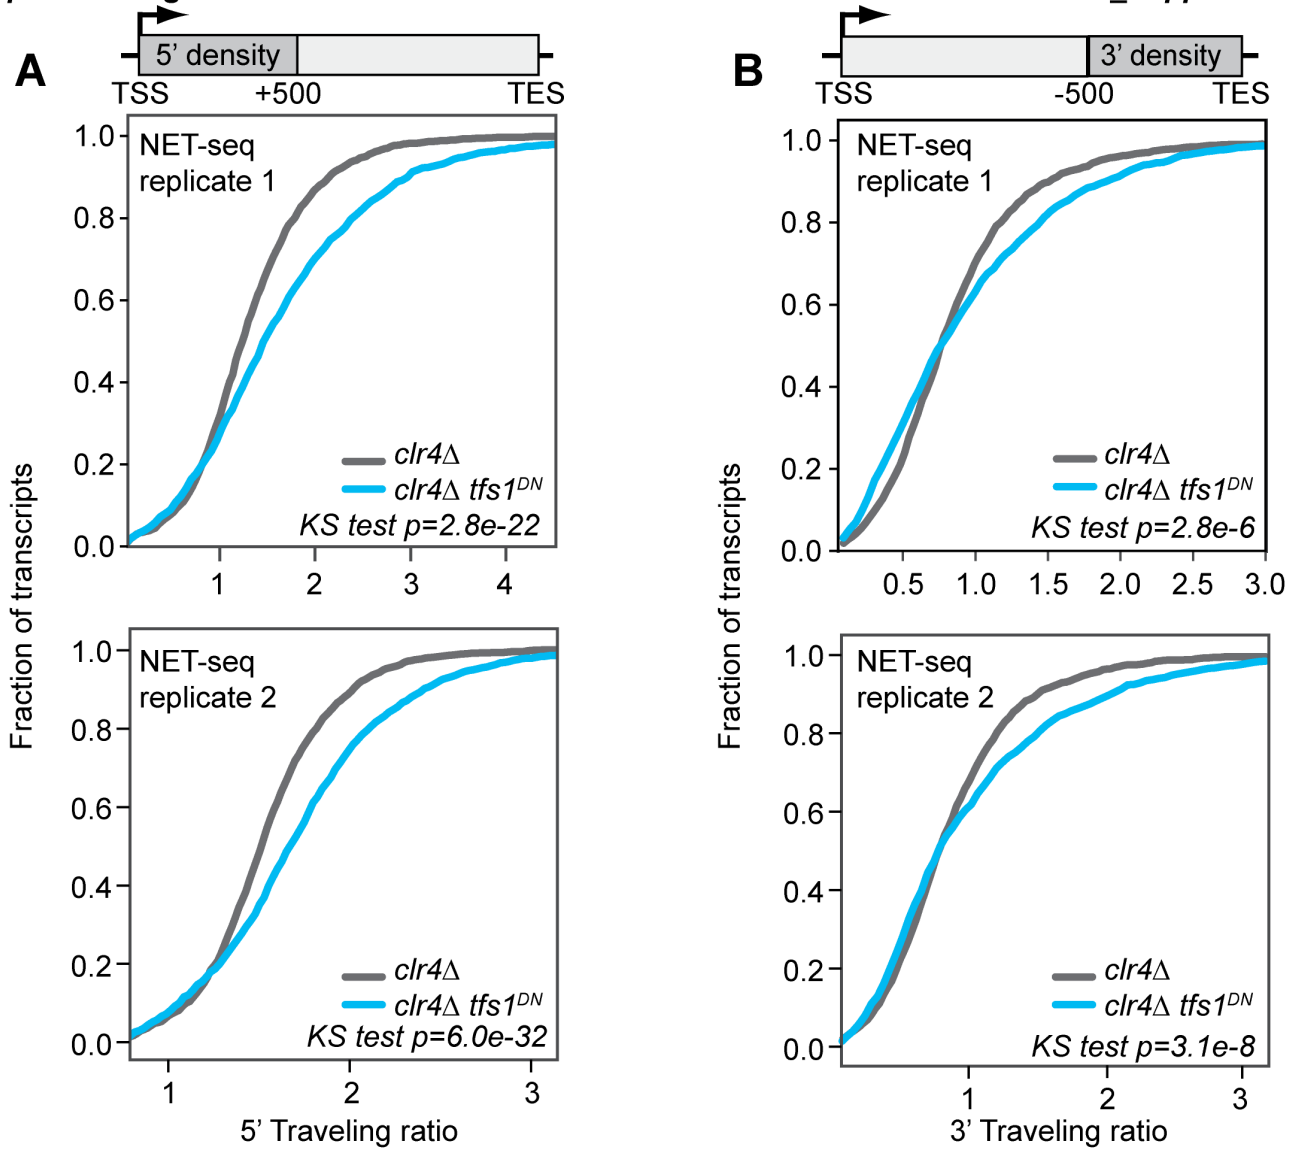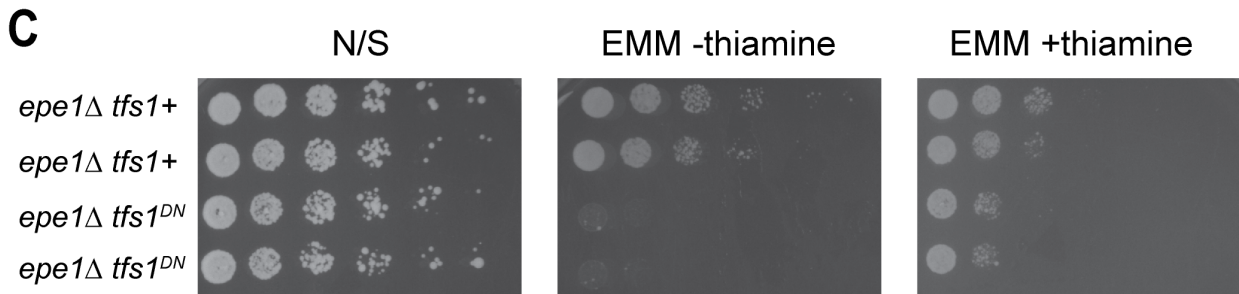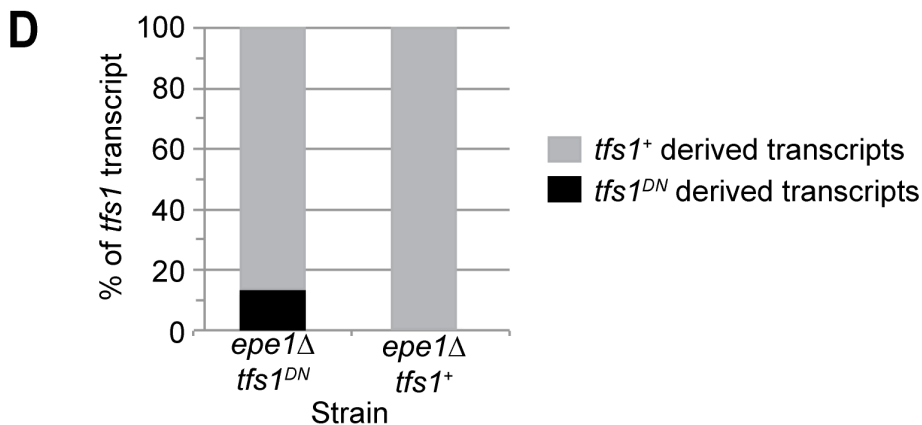

**Supplemental Figure S6. *pnmt1*<sup>+</sup>-*tfs1*<sup>DN</sup> expression impacts traveling ratios genome wide.** **A)** Cumulative distribution function (cdf) plots of 5' traveling ratios for *clr4*Δ (dark grey) to *clr4*Δ *tfs1*<sup>DN</sup> (blue) NET-seq strains for two replicates. KS tests were conducted for p-values. **B)** Cumulative distribution function (cdf) plots of 3' traveling ratios for *clr4*Δ (dark grey) to *clr4*Δ *tfs1*<sup>DN</sup> (blue) NET-seq strains for two replicates. KS tests were conducted for p-values. **C)** Growth assays on *epe1*Δ *tfs1*<sup>+</sup> and *epe1*Δ *tfs1*<sup>DN</sup> strains. Cells were plated on non-selective rich YS medium (N/S), EMM medium in the absence of thiamine (EMM -thiamine), and EMM medium containing 15uM thiamine (EMM +thiamine). **D)** Percent of total *tfs1* reads derived from the *tfs1*<sup>+</sup> (grey) and *tfs1*<sup>DN</sup> alleles (black) in *pnmt1*<sup>+</sup> repressible conditions (EMM 15uM thiamine) obtained from RNA-seq analysis of *epe1*Δ *tfs1*<sup>DN</sup> and *epe1*Δ *tfs1*<sup>+</sup> strains (no reads corresponding to the *tfs1*<sup>DN</sup> allele were observed in the *epe1*Δ *tfs1*<sup>+</sup> strain).
