# Supplementary material for: Polymerase pausing induced by sequence-specific RNA-binding protein drives heterochromatin assembly
Source: PubMed Central journal article supplement (PMC6075038; doi:10.1101/gad.310136.117), 2018-07-01
Supplement: supp_32.13-14.953_Supplemental_Fig_S7.pdf [file supp_32.13-14.953_Supplemental_Fig_S7.pdf]

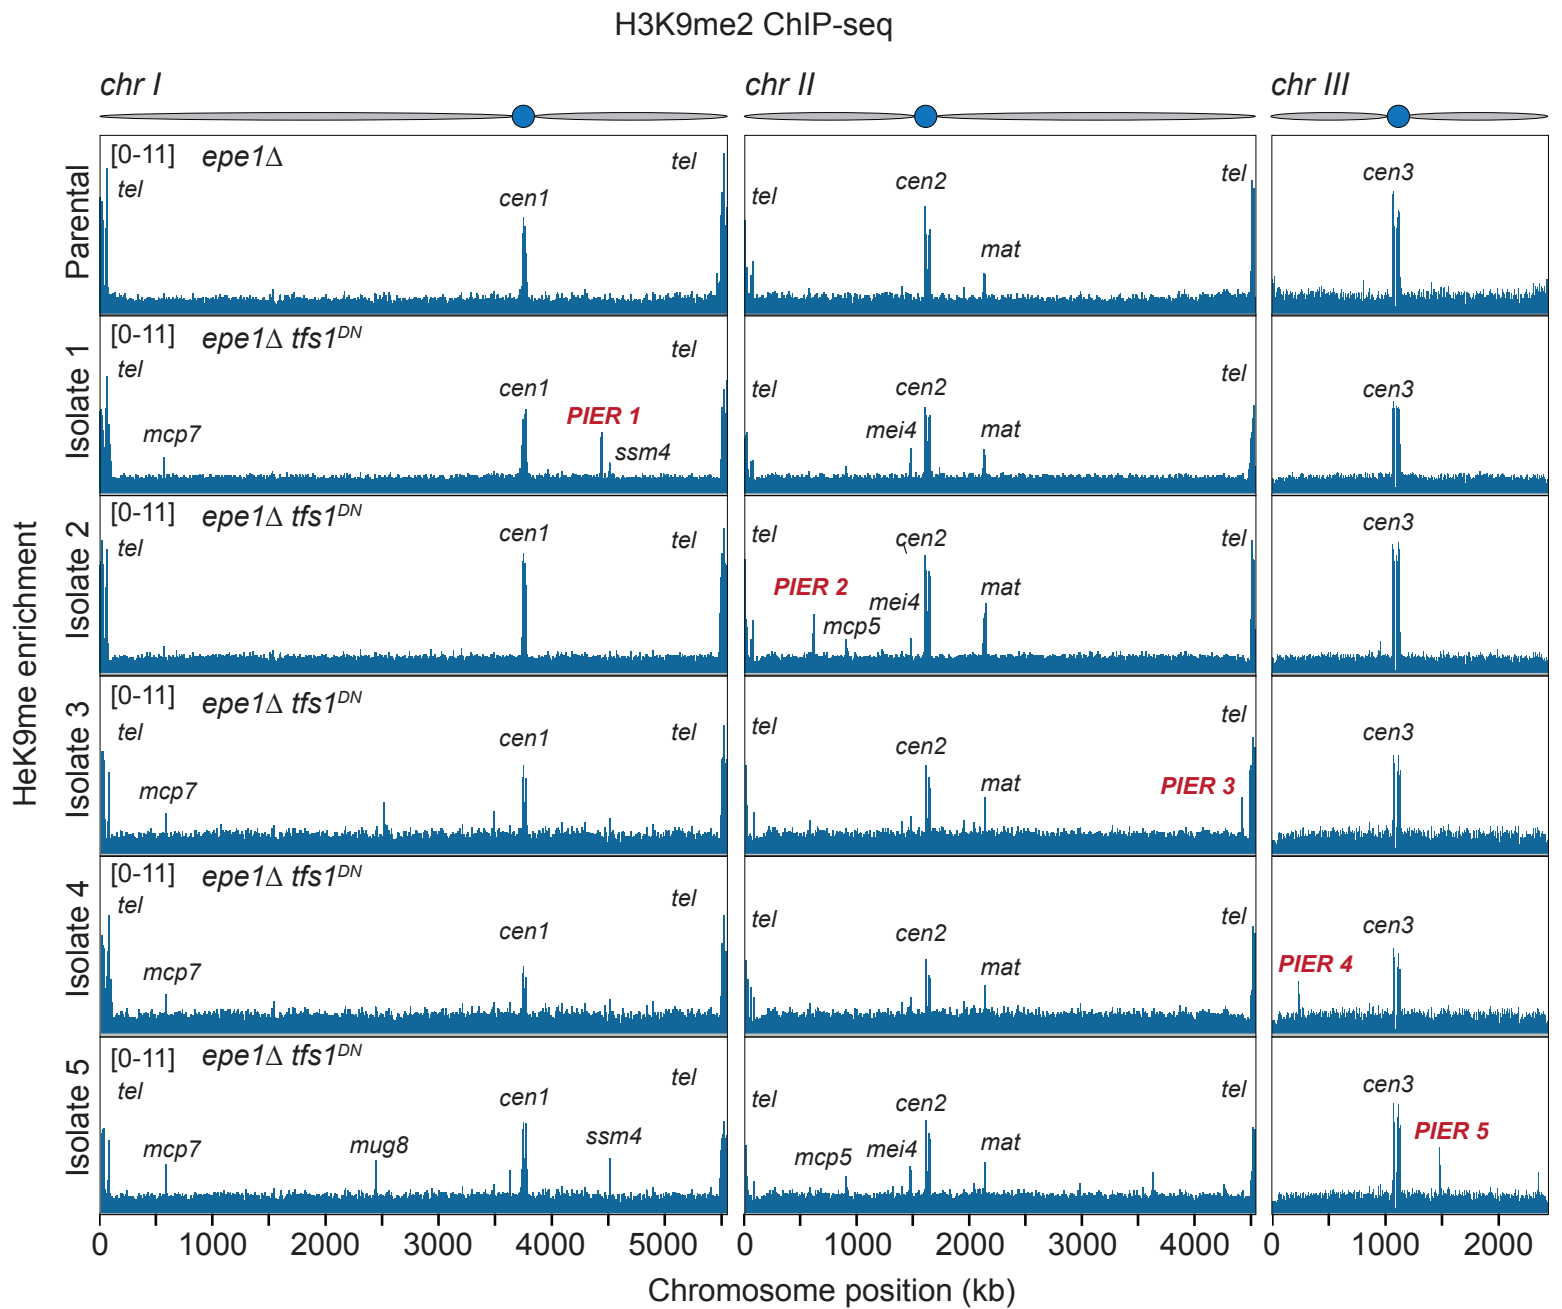

**Supplemental Figure S7.  $TFIS^{DN}$  expression induces ectopic heterochromatin.** Whole genome plots of H3K9me2 ChIP-seq enrichment for parental (*epe1Δ*) and *epe1Δ tfs1<sup>DN</sup>* isolates 1 through 5. Locations of PIERs noted in each plot.
