# Supplementary material for: Polymerase pausing induced by sequence-specific RNA-binding protein drives heterochromatin assembly
Source: PubMed Central journal article supplement (PMC6075038; doi:10.1101/gad.310136.117), 2018-07-01
Supplement: supp_32.13-14.953_Supplemental_Fig_S8.pdf [file supp_32.13-14.953_Supplemental_Fig_S8.pdf]

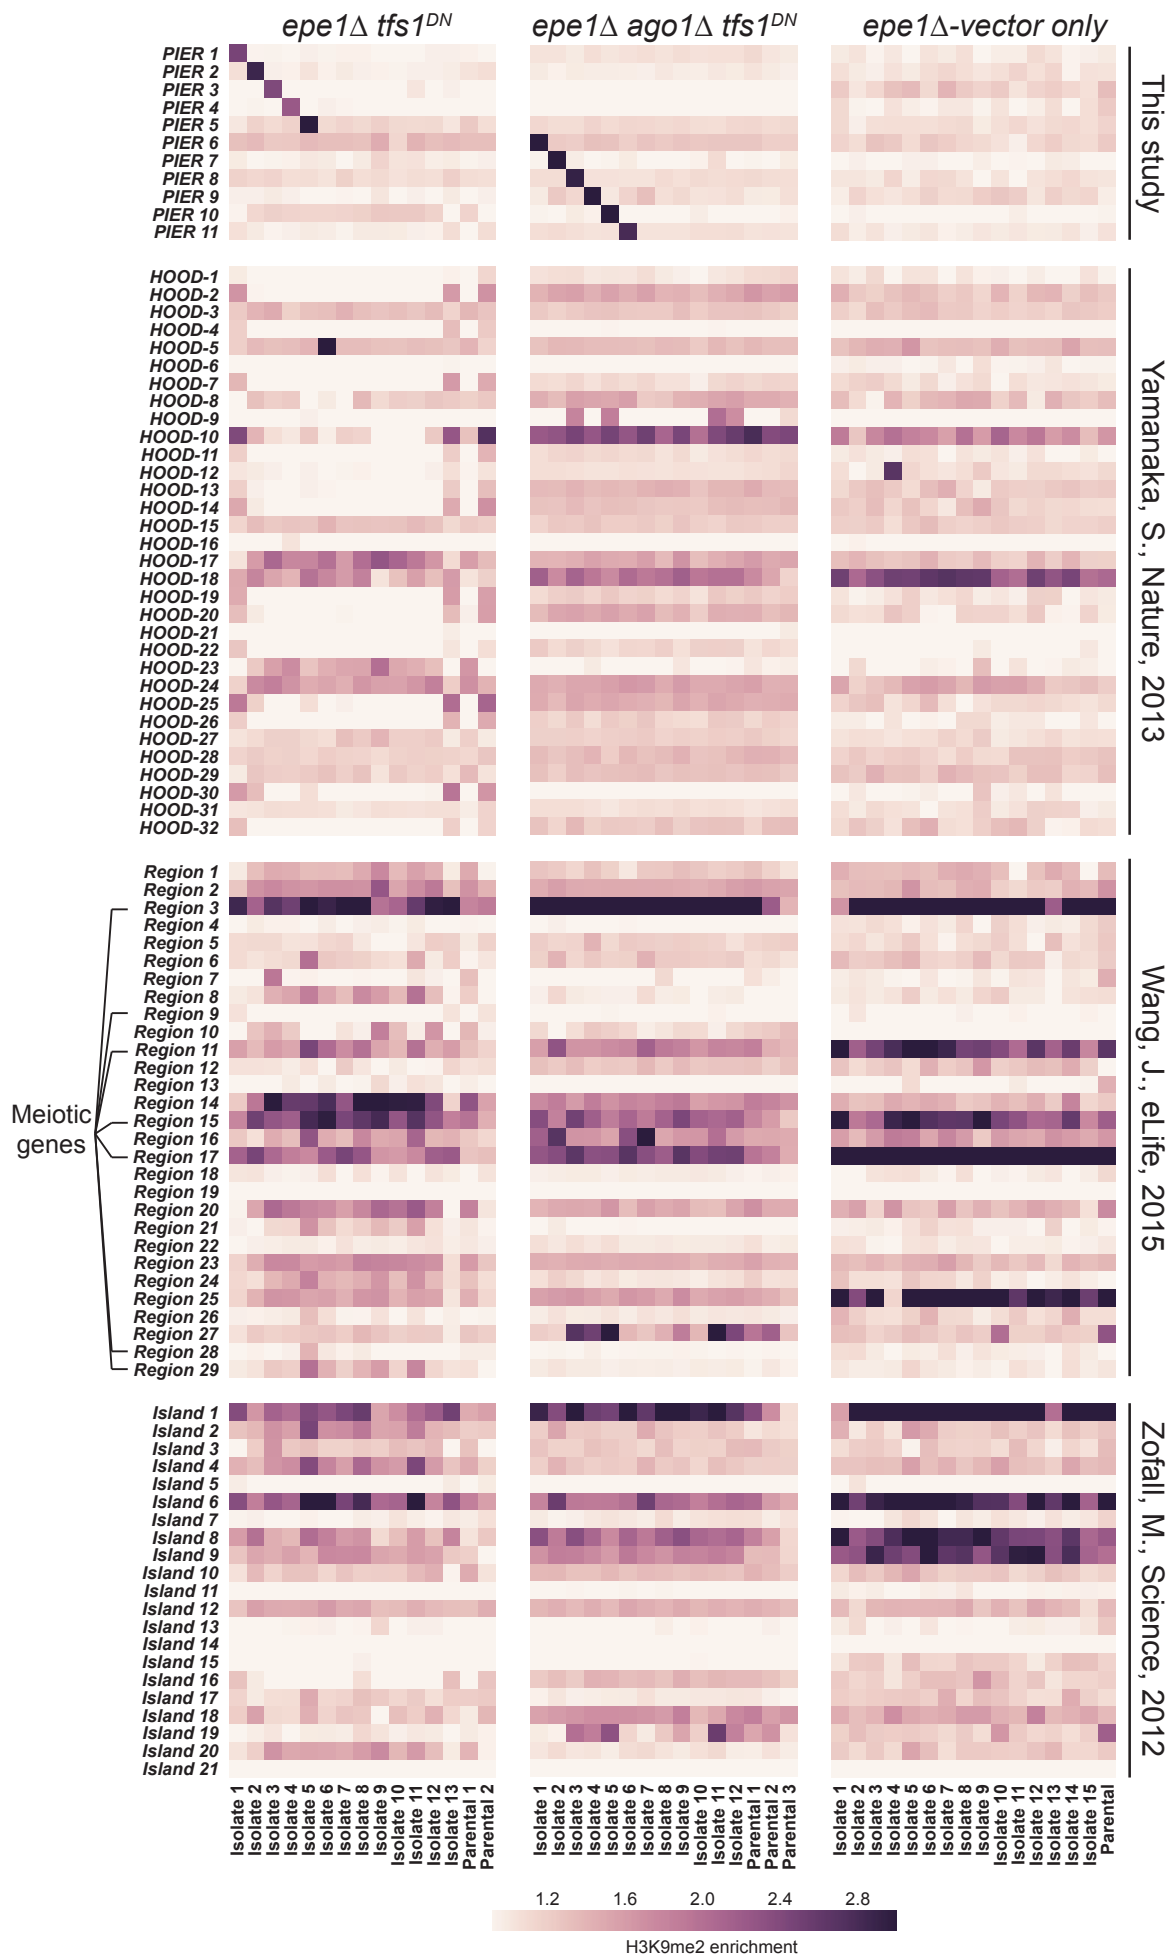

**Supplemental Figure S8. H3K9me enrichment at known heterochromatin nucleation sites and PIERs.** PIERs and known sites of heterochromatin nucleation were analyzed for H3K9me enrichment (see Methods). All isolates and parental strains for each genotype are depicted. HOODs, H3K9me islands, and meiotic genes are indicated.
