# Supplementary material for: Polymerase pausing induced by sequence-specific RNA-binding protein drives heterochromatin assembly
Source: PubMed Central journal article supplement (PMC6075038; doi:10.1101/gad.310136.117), 2018-07-01
Supplement: supp_32.13-14.953_Supplemental_Fig_S10.pdf [file supp_32.13-14.953_Supplemental_Fig_S10.pdf]

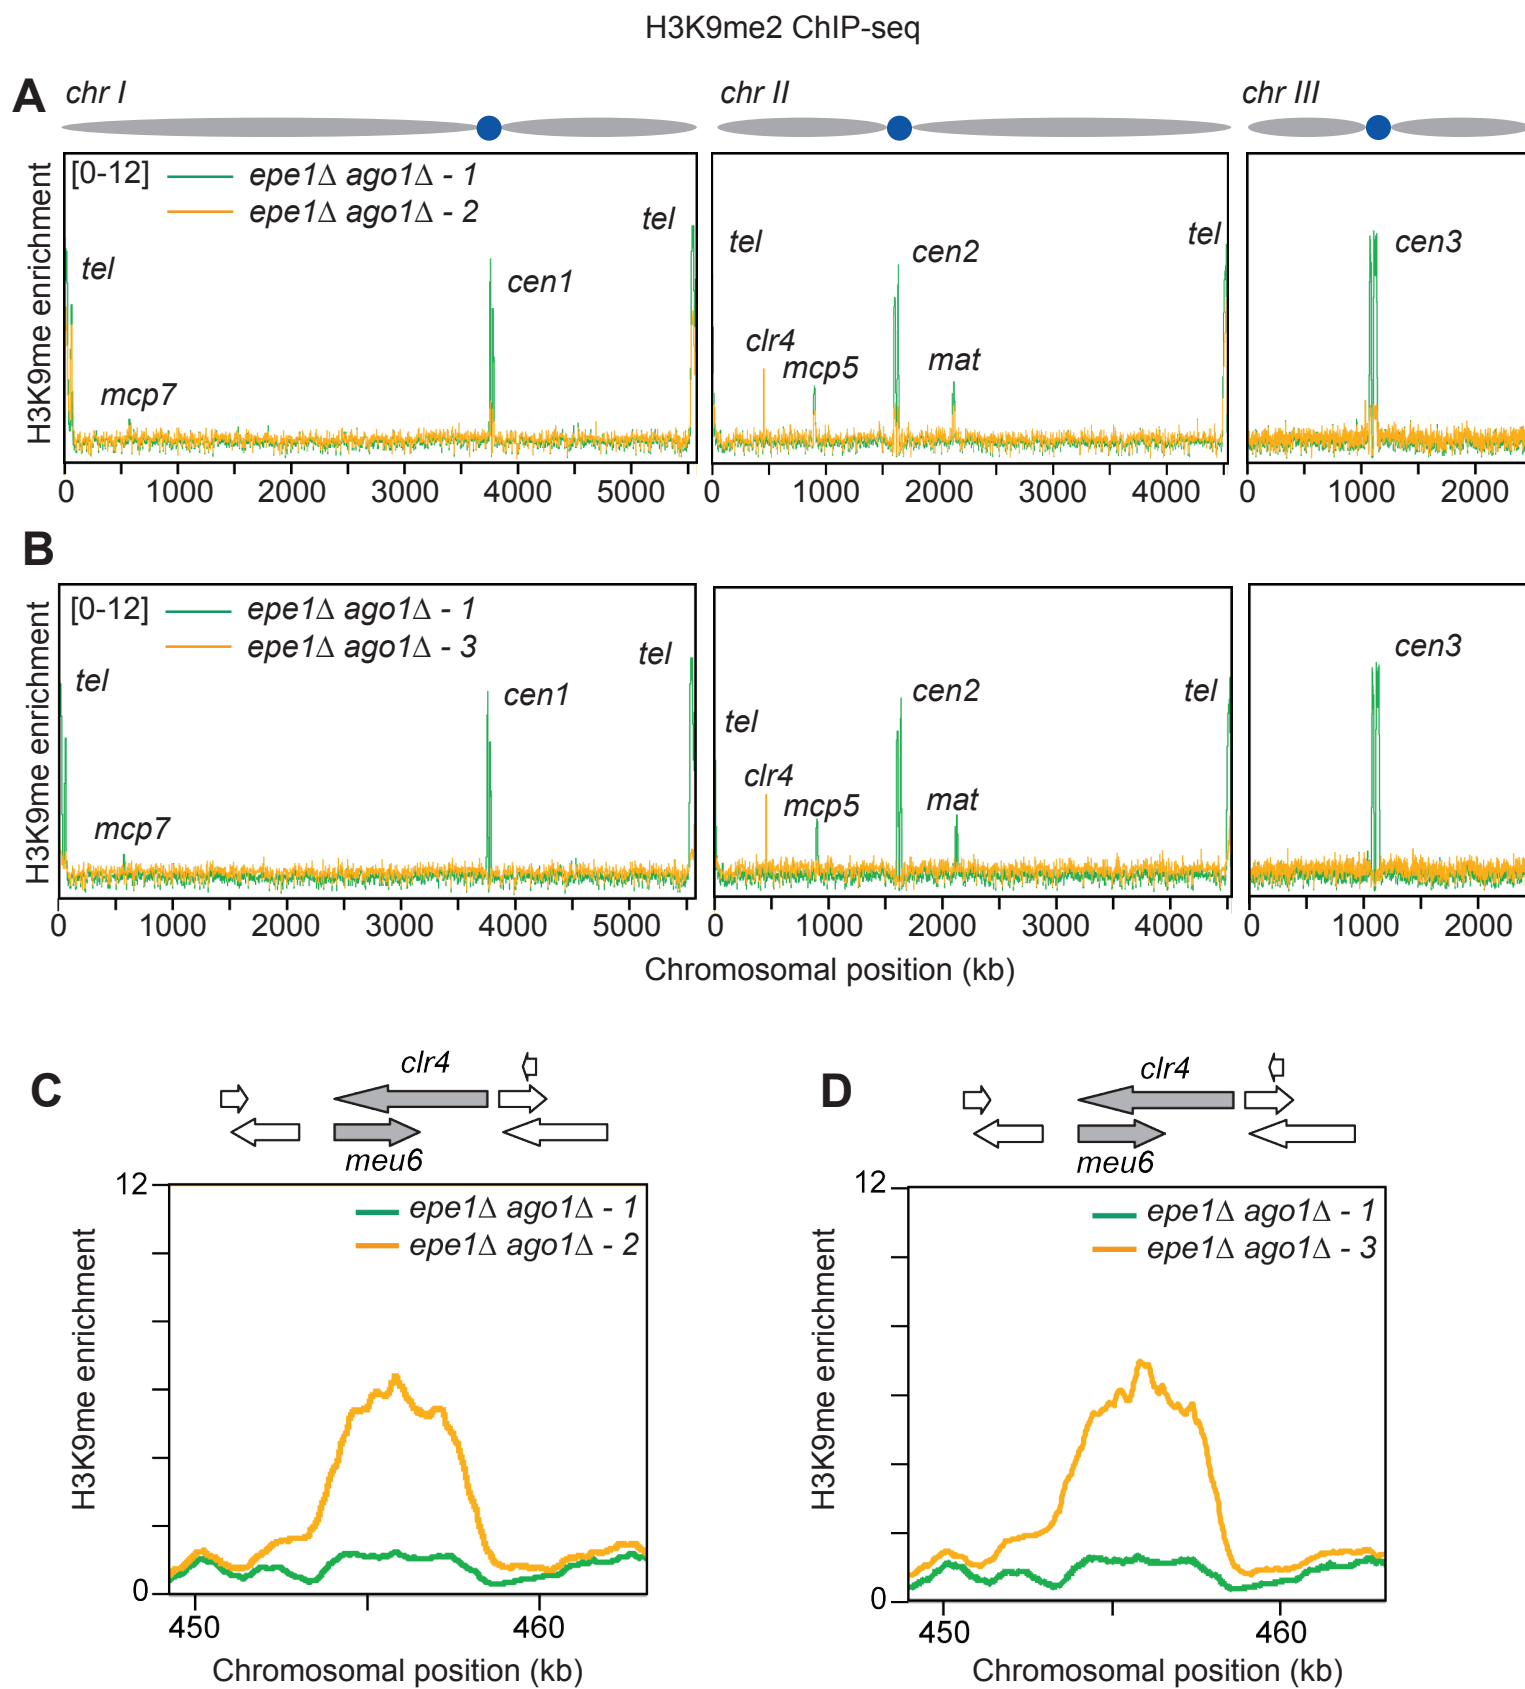

**Supplemental Figure S10. *epe1* $\Delta$  *ago1* $\Delta$  strains can adaptively silence the *clr4*<sup>+</sup> locus. A-B)** Whole genome H3K9me2 enrichment plots for two independent *epe1* $\Delta$  *ago1* $\Delta$  strains that accumulated H3K9me2 over the *clr4*<sup>+</sup> locus, *epe1* $\Delta$  *ago1* $\Delta$ -2 (**A**) and *epe1* $\Delta$  *ago1* $\Delta$ -3 (**B**) (in orange), compared to a isolate with normal distribution of H3K9me2 across the genome, *epe1* $\Delta$  *ago1* $\Delta$ -1 (in green). **C-D)** Genome browser image of the enrichment of H3K9me2 over *clr4*<sup>+</sup> locus in *epe1* $\Delta$  *ago1* $\Delta$ -2 (**C**) and *epe1* $\Delta$  *ago1* $\Delta$ -3 (**D**).
