# Supplementary material for: Polymerase pausing induced by sequence-specific RNA-binding protein drives heterochromatin assembly
Source: PubMed Central journal article supplement (PMC6075038; doi:10.1101/gad.310136.117), 2018-07-01
Supplement: supp_32.13-14.953_Supplemental_Fig_S12.pdf [file supp_32.13-14.953_Supplemental_Fig_S12.pdf]

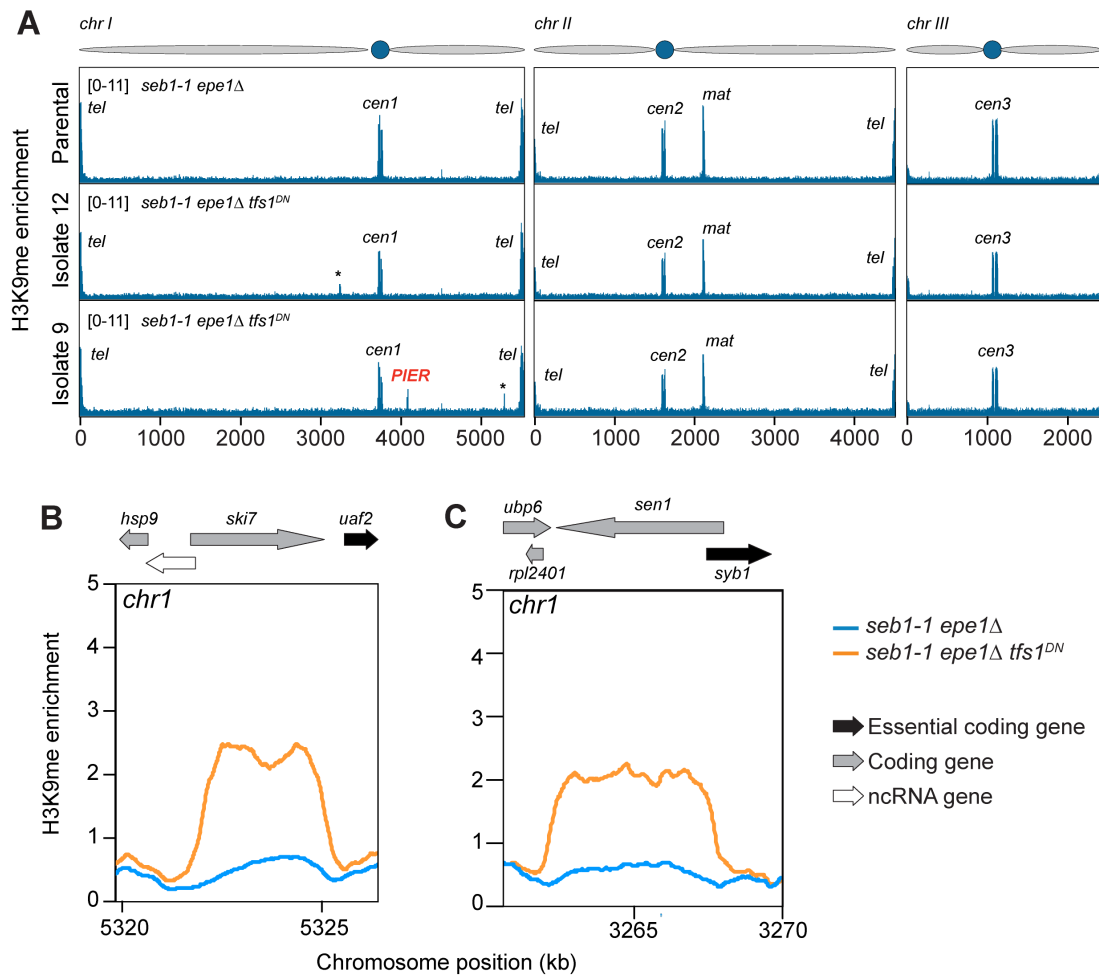

**Supplemental Figure S12. PIERs require Seb1 for assembly and enrichment of the H3K9me signal. A)** Genome-wide browser images of H3K9me enrichment. Asterisks demarcate regions of heterochromatin that do not pass our strict cutoffs for PIERs. **B and C)** Genome browser images of the two asterisks-marked loci in (A). H3K9me enrichment for *seb1-1 epe1Δ* (blue) and *seb1-1 epe1Δ tfs1<sup>DN</sup>* (orange).
