# Supplementary material for: Polymerase pausing induced by sequence-specific RNA-binding protein drives heterochromatin assembly
Source: PubMed Central journal article supplement (PMC6075038; doi:10.1101/gad.310136.117), 2018-07-01
Supplement: supp_32.13-14.953_Supplemental_Fig_S13.pdf [file supp_32.13-14.953_Supplemental_Fig_S13.pdf]

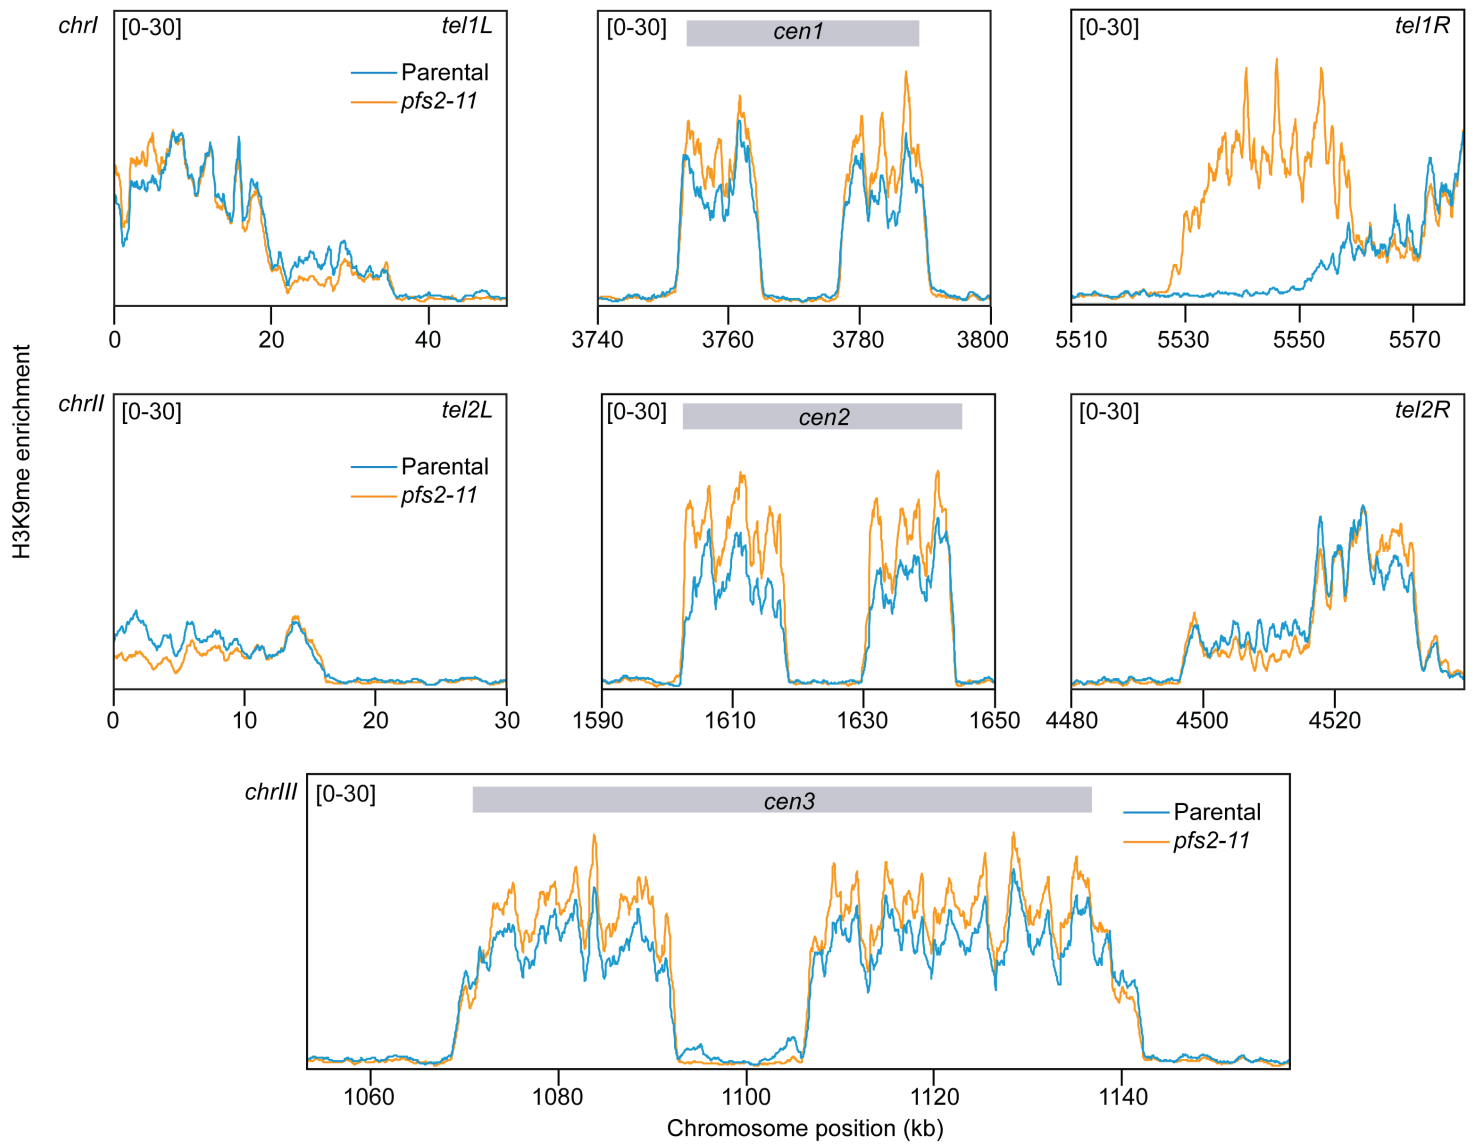

**Supplemental Figure S13. Mutations in CPA machinery result in increased H3K9me enrichment at constitutive heterochromatic loci.** Replicate data for H3K9me ChIP-seq for *pfs2-11* (Figure 5B-D). Telomeres from chromosomes I and II and centromeres from chromosomes I, II and II depicted. Parent (blue), *pfs2-11* mutant (orange).
