# Supplementary material for: Polymerase pausing induced by sequence-specific RNA-binding protein drives heterochromatin assembly
Source: PubMed Central journal article supplement (PMC6075038; doi:10.1101/gad.310136.117), 2018-07-01
Supplement: supp_32.13-14.953_Supplemental_Table_S3.pdf [file supp_32.13-14.953_Supplemental_Table_S3.pdf]

**Supplemental Table S3. List of chromosome coordinates of the fragments used in this study from the right arm of centromere I.**

| Fragment   | Chromosome | Chromosome coordinate |
|------------|------------|-----------------------|
| Fragment 1 | 1          | 3787059..3789869      |
| Fragment 2 | 1          | 3785843..3788836      |
| Fragment 3 | 1          | 3784847..3787081      |
| Fragment 4 | 1          | 3783812..3785861      |
| Fragment 5 | 1          | 3782652..3784867      |
| Fragment 6 | 1          | 3781725..3783833      |
| Fragment 7 | 1          | 3780535..3782675      |
| Fragment 8 | 1          | 3779557..3781747      |
| Fragment 9 | 1          | 3778457..3780555      |
