# Supplementary material for: Polymerase pausing induced by sequence-specific RNA-binding protein drives heterochromatin assembly
Source: PubMed Central journal article supplement (PMC6075038; doi:10.1101/gad.310136.117), 2018-07-01
Supplement: supp_32.13-14.953_Supplemental_Table_S5.pdf [file supp_32.13-14.953_Supplemental_Table_S5.pdf]

**Supplemental Table S5. List of strains and plasmids used in this study.**

| Strain Number | Genotype                                                                                                                          | Use                                     |
|---------------|-----------------------------------------------------------------------------------------------------------------------------------|-----------------------------------------|
| PM06          | <i>S. pombe</i> wild type strain 972 <i>M(h-)</i>                                                                                 | Parental strain                         |
| PM26          | PM06, <i>ura4::padh1<sup>+</sup></i> -Fragment 1A-ter-Bboxes- <i>natMX</i>                                                        | <i>ura4<sup>+</sup></i> Silencing Assay |
| PM27          | PM06, <i>ura4::padh1<sup>+</sup></i> -Fragment 1S-ter-Bboxes- <i>natMX</i>                                                        | <i>ura4<sup>+</sup></i> Silencing Assay |
| PM28          | PM06, <i>ura4::padh1<sup>+</sup></i> -Fragment 2A-ter-Bboxes- <i>natMX</i>                                                        | <i>ura4<sup>+</sup></i> Silencing Assay |
| PM31          | PM06, <i>ura4::padh1<sup>+</sup></i> -Fragment 2S-ter-Bboxes- <i>natMX</i>                                                        | <i>ura4<sup>+</sup></i> Silencing Assay |
| PM68          | PM06, <i>ura4::padh1<sup>+</sup></i> -Fragment 3A-ter-Bboxes- <i>natMX</i>                                                        | <i>ura4<sup>+</sup></i> Silencing Assay |
| PM34          | PM06, <i>ura4::padh1<sup>+</sup></i> -Fragment 3S-ter-Bboxes- <i>natMX</i>                                                        | <i>ura4<sup>+</sup></i> Silencing Assay |
| PM37          | PM06, <i>ura4::padh1<sup>+</sup></i> -Fragment 4A-ter-Bboxes- <i>natMX</i>                                                        | <i>ura4<sup>+</sup></i> Silencing Assay |
| PM39          | PM06, <i>ura4::padh1<sup>+</sup></i> -Fragment 4S-ter-Bboxes- <i>natMX</i>                                                        | <i>ura4<sup>+</sup></i> Silencing Assay |
| PM42          | PM06, <i>ura4::padh1<sup>+</sup></i> -Fragment 5A-ter-Bboxes- <i>natMX</i>                                                        | <i>ura4<sup>+</sup></i> Silencing Assay |
| PM45          | PM06, <i>ura4::padh1<sup>+</sup></i> -Fragment 5S-ter-Bboxes- <i>natMX</i>                                                        | <i>ura4<sup>+</sup></i> Silencing Assay |
| PM48          | PM06, <i>ura4::padh1<sup>+</sup></i> -Fragment 6A-ter-Bboxes- <i>natMX</i>                                                        | <i>ura4<sup>+</sup></i> Silencing Assay |
| PM51          | PM06, <i>ura4::padh1<sup>+</sup></i> -Fragment 6S-ter-Bboxes- <i>natMX</i>                                                        | <i>ura4<sup>+</sup></i> Silencing Assay |
| PM54          | PM06, <i>ura4::padh1<sup>+</sup></i> -Fragment 7A-ter-Bboxes- <i>natMX</i>                                                        | <i>ura4<sup>+</sup></i> Silencing Assay |
| PM57          | PM06, <i>ura4::padh1<sup>+</sup></i> -Fragment 7S-ter-Bboxes- <i>natMX</i>                                                        | <i>ura4<sup>+</sup></i> Silencing Assay |
| PM60          | PM06, <i>ura4::padh1<sup>+</sup></i> -Fragment 8A-ter-Bboxes- <i>natMX</i>                                                        | <i>ura4<sup>+</sup></i> Silencing Assay |
| PM63          | PM06, <i>ura4::padh1<sup>+</sup></i> -Fragment 8S-ter-Bboxes- <i>natMX</i>                                                        | <i>ura4<sup>+</sup></i> Silencing Assay |
| PM70          | PM06, <i>ura4::padh1<sup>+</sup></i> -Fragment 9A-ter-Bboxes- <i>natMX</i>                                                        | <i>ura4<sup>+</sup></i> Silencing Assay |
| PM65          | PM06, <i>ura4::padh1<sup>+</sup></i> -Fragment 9S-ter-Bboxes- <i>natMX</i>                                                        | <i>ura4<sup>+</sup></i> Silencing Assay |
| PM251         | <i>P(h+)</i> , <i>ura4-DS/E</i> , <i>ade6-210</i> , <i>leu1-32</i> , <i>imr1L(Ncol)::ura4+</i> , <i>otr1R(SphI)::ade6+</i>        | <i>ura4<sup>+</sup></i> Silencing Assay |
| PM131         | PM06, <i>ura4::padh1<sup>+</sup></i> -ter-Bboxes- <i>natMX</i>                                                                    | <i>ura4<sup>+</sup></i> Silencing Assay |
| PM1316        | PM06, <i>seb1-1::natMX</i>                                                                                                        | RNA-seq                                 |
| PM2366        | <i>ade6-M210</i> , <i>leu1-32</i> , <i>ura4-DS/E</i> , <i>imr1L(Ncol)::ura4+</i> , <i>clr4::hygMX</i> , <i>rpb3-3xFLAG::kanMX</i> | NET-Seq Strain and Rpb3-3xFLAG ChIP-Seq |
| PM2368        | PM2368, <i>seb1-1::natMX</i>                                                                                                      | NET-Seq Strain and Rpb3-3xFLAG ChIP-Seq |
| PM2369        | PM2368, <i>leu1::pDUAL-pnmt1<sup>+</sup>-tfs1<sup>DN</sup></i>                                                                    | NET-Seq Strain 1                        |
| PM2370        | PM2369, <i>leu1::pDUAL-pnmt1<sup>+</sup>-tfs1<sup>DN</sup></i>                                                                    | NET-Seq Strain 2                        |
| PM2359        | <i>leu1-32</i> , <i>ade6-M210</i> , <i>seb1-cHTP::kanMX</i> , <i>clr4::hygMX</i>                                                  | PAR-CLIP strain                         |
| PM964         | <i>ade6-M210</i> , <i>leu1-32</i> , <i>ura4-D18</i> , <i>epe1::kanMX M(h-)</i>                                                    | <i>epe1Δ</i> Parental                   |
| PM2371        | PM964, <i>leu1::pDUAL-pnmt1<sup>+</sup></i>                                                                                       | Isolate 1                               |
| PM2372        | PM964, <i>leu1::pDUAL-pnmt1<sup>+</sup></i>                                                                                       | Isolate 2                               |
| PM2373        | PM964, <i>leu1::pDUAL-pnmt1<sup>+</sup></i>                                                                                       | Isolate 3                               |
| PM2374        | PM964, <i>leu1::pDUAL-pnmt1<sup>+</sup></i>                                                                                       | Isolate 4                               |
| PM2375        | PM964, <i>leu1::pDUAL-pnmt1<sup>+</sup></i>                                                                                       | Isolate 5                               |
| PM2376        | PM964, <i>leu1::pDUAL-pnmt1<sup>+</sup></i>                                                                                       | Isolate 6                               |
| PM2377        | PM964, <i>leu1::pDUAL-pnmt1<sup>+</sup></i>                                                                                       | Isolate 7                               |
| PM2378        | PM964, <i>leu1::pDUAL-pnmt1<sup>+</sup></i>                                                                                       | Isolate 8                               |
| PM2379        | PM964, <i>leu1::pDUAL-pnmt1<sup>+</sup></i>                                                                                       | Isolate 9                               |
| PM2380        | PM964, <i>leu1::pDUAL-pnmt1<sup>+</sup></i>                                                                                       | Isolate 10                              |
| PM2381        | PM964, <i>leu1::pDUAL-pnmt1<sup>+</sup></i>                                                                                       | Isolate 11                              |
| PM2382        | PM964, <i>leu1::pDUAL-pnmt1<sup>+</sup></i>                                                                                       | Isolate 12                              |
| PM2383        | PM964, <i>leu1::pDUAL-pnmt1<sup>+</sup></i>                                                                                       | Isolate 13                              |
| PM2384        | PM964, <i>leu1::pDUAL-pnmt1<sup>+</sup></i>                                                                                       | Isolate 14                              |
| PM2385        | PM964, <i>leu1::pDUAL-pnmt1<sup>+</sup></i>                                                                                       | Isolate 15                              |
| PM2390        | PM964, <i>leu1::pDUAL-pnmt1<sup>+</sup>-tfs1<sup>DN</sup></i>                                                                     | Isolate 1 - PIER1                       |
| PM2391        | PM964, <i>leu1::pDUAL-pnmt1<sup>+</sup>-tfs1<sup>DN</sup></i>                                                                     | Isolate 2 - PIER2                       |
| PM2392        | PM964, <i>leu1::pDUAL-pnmt1<sup>+</sup>-tfs1<sup>DN</sup></i>                                                                     | Isolate 3 - PIER3                       |
| PM2393        | PM964, <i>leu1::pDUAL-pnmt1<sup>+</sup>-tfs1<sup>DN</sup></i>                                                                     | Isolate 4 - PIER4                       |

|        |                                                                |                                         |
|--------|----------------------------------------------------------------|-----------------------------------------|
| PM2394 | PM964, <i>leu1::pDUAL-pnmt1<sup>+</sup>-tfs1<sup>DN</sup></i>  | Isolate 5 - PIER5                       |
| PM2395 | PM964, <i>leu1::pDUAL-pnmt1<sup>+</sup>-tfs1<sup>DN</sup></i>  | Isolate 6                               |
| PM2396 | PM964, <i>leu1::pDUAL-pnmt1<sup>+</sup>-tfs1<sup>DN</sup></i>  | Isolate 7                               |
| PM2397 | PM964, <i>leu1::pDUAL-pnmt1<sup>+</sup>-tfs1<sup>DN</sup></i>  | Isolate 8                               |
| PM2398 | PM964, <i>leu1::pDUAL-pnmt1<sup>+</sup>-tfs1<sup>DN</sup></i>  | Isolate 9                               |
| PM2399 | PM964, <i>leu1::pDUAL-pnmt1<sup>+</sup>-tfs1<sup>DN</sup></i>  | Isolate 10                              |
| PM2400 | PM964, <i>leu1::pDUAL-pnmt1<sup>+</sup>-tfs1<sup>DN</sup></i>  | Isolate 11                              |
| PM2401 | PM964, <i>leu1::pDUAL-pnmt1<sup>+</sup>-tfs1<sup>DN</sup></i>  | Isolate 12                              |
| PM2402 | PM964, <i>leu1::pDUAL-pnmt1<sup>+</sup>-tfs1<sup>DN</sup></i>  | Isolate 13                              |
| PM2403 | PM964, <i>ago1::natMX</i>                                      | Parental Isolate 1                      |
| PM2404 | PM964, <i>ago1::natMX</i>                                      | Parental Isolate 2                      |
| PM2405 | PM964, <i>ago1::natMX</i>                                      | Parental Isolate 3                      |
| PM2406 | PM2404, <i>leu1::pDUAL-pnmt1<sup>+</sup>-tfs1<sup>DN</sup></i> | Isolate 1 - PIER6                       |
| PM2407 | PM2403, <i>leu1::pDUAL-pnmt1<sup>+</sup>-tfs1<sup>DN</sup></i> | Isolate 2 - PIER7                       |
| PM2408 | PM2405, <i>leu1::pDUAL-pnmt1<sup>+</sup>-tfs1<sup>DN</sup></i> | Isolate 3 - PIER8                       |
| PM2409 | PM2404, <i>leu1::pDUAL-pnmt1<sup>+</sup>-tfs1<sup>DN</sup></i> | Isolate 4 - PIER9                       |
| PM2410 | PM2405, <i>leu1::pDUAL-pnmt1<sup>+</sup>-tfs1<sup>DN</sup></i> | Isolate 5 - PIER10                      |
| PM2411 | PM2403, <i>leu1::pDUAL-pnmt1<sup>+</sup>-tfs1<sup>DN</sup></i> | Isolate 6 - PIER11                      |
| PM2412 | PM2403, <i>leu1::pDUAL-pnmt1<sup>+</sup>-tfs1<sup>DN</sup></i> | Isolate 7                               |
| PM2413 | PM2404, <i>leu1::pDUAL-pnmt1<sup>+</sup>-tfs1<sup>DN</sup></i> | Isolate 8                               |
| PM2414 | PM2404, <i>leu1::pDUAL-pnmt1<sup>+</sup>-tfs1<sup>DN</sup></i> | Isolate 9                               |
| PM2415 | PM2404, <i>leu1::pDUAL-pnmt1<sup>+</sup>-tfs1<sup>DN</sup></i> | Isolate 10                              |
| PM2416 | PM2405, <i>leu1::pDUAL-pnmt1<sup>+</sup>-tfs1<sup>DN</sup></i> | Isolate 11                              |
| PM2417 | PM2405, <i>leu1::pDUAL-pnmt1<sup>+</sup>-tfs1<sup>DN</sup></i> | Isolate 12                              |
| PM2418 | <i>leu1-32, ura4-D18, seb1-1::hygMX, epe1Δ::kanMX</i>          | Parental                                |
| PM2419 | PM2418, <i>leu1::pDUAL-pnmt1<sup>+</sup>-tfs1<sup>DN</sup></i> | Isolate 1                               |
| PM2420 | PM2418, <i>leu1::pDUAL-pnmt1<sup>+</sup>-tfs1<sup>DN</sup></i> | Isolate 2                               |
| PM2421 | PM2418, <i>leu1::pDUAL-pnmt1<sup>+</sup>-tfs1<sup>DN</sup></i> | Isolate 3                               |
| PM2422 | PM2418, <i>leu1::pDUAL-pnmt1<sup>+</sup>-tfs1<sup>DN</sup></i> | Isolate 4                               |
| PM2423 | PM2418, <i>leu1::pDUAL-pnmt1<sup>+</sup>-tfs1<sup>DN</sup></i> | Isolate 5                               |
| PM2424 | PM2418, <i>leu1::pDUAL-pnmt1<sup>+</sup>-tfs1<sup>DN</sup></i> | Isolate 6                               |
| PM2425 | PM2418, <i>leu1::pDUAL-pnmt1<sup>+</sup>-tfs1<sup>DN</sup></i> | Isolate 7                               |
| PM2426 | PM2418, <i>leu1::pDUAL-pnmt1<sup>+</sup>-tfs1<sup>DN</sup></i> | Isolate 8                               |
| PM2427 | PM2418, <i>leu1::pDUAL-pnmt1<sup>+</sup>-tfs1<sup>DN</sup></i> | Isolate 9                               |
| PM2428 | PM2418, <i>leu1::pDUAL-pnmt1<sup>+</sup>-tfs1<sup>DN</sup></i> | Isolate 10                              |
| PM2429 | PM2418, <i>leu1::pDUAL-pnmt1<sup>+</sup>-tfs1<sup>DN</sup></i> | Isolate 11                              |
| PM2430 | PM2418, <i>leu1::pDUAL-pnmt1<sup>+</sup>-tfs1<sup>DN</sup></i> | Isolate 12                              |
| PM2431 | PM2418, <i>leu1::pDUAL-pnmt1<sup>+</sup>-tfs1<sup>DN</sup></i> | Isolate 13                              |
| PM2432 | PM2418, <i>leu1::pDUAL-pnmt1<sup>+</sup>-tfs1<sup>DN</sup></i> | Isolate 14                              |
| PM2433 | PM2418, <i>leu1::pDUAL-pnmt1<sup>+</sup>-tfs1<sup>DN</sup></i> | Isolate 15                              |
| PM2434 | <i>h-</i>                                                      | ChIP-seq *                              |
| PM2435 | PM2434, <i>afs2-11</i>                                         | ChIP-seq *                              |
| PM2436 | PM28, <i>seb1-1::hygMX</i>                                     | <i>ura4<sup>+</sup></i> Silencing Assay |
| PM2437 | PM63, <i>seb1-1::hygMX</i>                                     | <i>ura4<sup>+</sup></i> Silencing Assay |
| PM2438 | PM65, <i>seb1-1::hygMX</i>                                     | <i>ura4<sup>+</sup></i> Silencing Assay |

| Strain number | Plasmid                                          |    |
|---------------|--------------------------------------------------|----|
| BHM2306       | <i>pDUAL-pnmt1<sup>+</sup></i>                   | ** |
| BHM2308       | <i>pDUAL-pnmt1<sup>+</sup>-tfs1<sup>DN</sup></i> |    |

\* Obtained from Chris Norbury (The University of Oxford)

\*\* Obtained from Robin Allshire (The University of Edinburgh)
