# Supplementary material for: Polymerase pausing induced by sequence-specific RNA-binding protein drives heterochromatin assembly
Source: PubMed Central journal article supplement (PMC6075038; doi:10.1101/gad.310136.117), 2018-07-01
Supplement: supp_32.13-14.953_Supplemental_Table_S6.pdf [file supp_32.13-14.953_Supplemental_Table_S6.pdf]

**Supplemental Table S6. Known heterochromatin recruitment sites**

| Chromosome | Start   | End     | Name             | Reference                |
|------------|---------|---------|------------------|--------------------------|
| I          | 64559   | 66980   | Region 1         | Wang, J. eLife, 2015     |
| I          | 241008  | 247574  | Region 2         | Wang, J. eLife, 2015     |
| I          | 578392  | 581553  | Region 3         | Wang, J. eLife, 2015     |
| I          | 1024002 | 1029993 | Region 4         | Wang, J. eLife, 2015     |
| I          | 1892505 | 1896752 | Region 5         | Wang, J. eLife, 2015     |
| I          | 2442000 | 2452000 | Region 6         | Wang, J. eLife, 2015     |
| I          | 2517000 | 2527000 | Region 7         | Wang, J. eLife, 2015     |
| I          | 3646000 | 3650000 | Region 8         | Wang, J. eLife, 2015     |
| I          | 3726000 | 3730000 | Region 9         | Wang, J. eLife, 2015     |
| I          | 4529389 | 4531031 | Region 10        | Wang, J. eLife, 2015     |
| I          | 4530000 | 4540000 | Region 11        | Wang, J. eLife, 2015     |
| I          | 4642290 | 4647689 | Region 12        | Wang, J. eLife, 2015     |
| I          | 4648000 | 4656000 | Region 13        | Wang, J. eLife, 2015     |
| II         | 350692  | 352369  | Region 14        | Wang, J. eLife, 2015     |
| II         | 892000  | 904000  | Region 15        | Wang, J. eLife, 2015     |
| II         | 1309072 | 1311834 | Region 16        | Wang, J. eLife, 2015     |
| II         | 1473125 | 1475285 | Region 17        | Wang, J. eLife, 2015     |
| II         | 1863000 | 1871000 | Region 18        | Wang, J. eLife, 2015     |
| II         | 2196424 | 2202652 | Region 19        | Wang, J. eLife, 2015     |
| II         | 2335176 | 2337787 | Region 20        | Wang, J. eLife, 2015     |
| II         | 3622580 | 3628658 | Region 21        | Wang, J. eLife, 2015     |
| II         | 3668000 | 3678000 | Region 22        | Wang, J. eLife, 2015     |
| II         | 3682000 | 3688000 | Region 23        | Wang, J. eLife, 2015     |
| II         | 4252276 | 4255310 | Region 24        | Wang, J. eLife, 2015     |
| III        | 275261  | 277340  | Region 25        | Wang, J. eLife, 2015     |
| III        | 386020  | 390514  | Region 26        | Wang, J. eLife, 2015     |
| III        | 1034000 | 1042000 | Region 27        | Wang, J. eLife, 2015     |
| III        | 1451701 | 1457855 | Region 28        | Wang, J. eLife, 2015     |
| III        | 2364000 | 2372000 | Region 29        | Wang, J. eLife, 2015     |
|            |         |         |                  |                          |
|            |         |         |                  |                          |
| I          | 578000  | 582000  | <i>Island 1</i>  | Zofall, M. Science, 2012 |
| I          | 2447000 | 2449000 | <i>Island 2</i>  | Zofall, M. Science, 2012 |
| I          | 2521000 | 2525000 | <i>Island 3</i>  | Zofall, M. Science, 2012 |
| I          | 3647000 | 3651000 | <i>Island 4</i>  | Zofall, M. Science, 2012 |
| I          | 3727000 | 3730000 | <i>Island 5</i>  | Zofall, M. Science, 2012 |
| I          | 4534000 | 4540000 | <i>Island 6</i>  | Zofall, M. Science, 2012 |
| I          | 4653000 | 4656000 | <i>Island 7</i>  | Zofall, M. Science, 2012 |
| II         | 898000  | 903000  | <i>Island 8</i>  | Zofall, M. Science, 2012 |
| II         | 1472000 | 1479000 | <i>Island 9</i>  | Zofall, M. Science, 2012 |
| II         | 1551000 | 1554000 | <i>Island 10</i> | Zofall, M. Science, 2012 |
| II         | 1670000 | 1680000 | <i>Island 11</i> | Zofall, M. Science, 2012 |
| II         | 1692000 | 1698000 | <i>Island 12</i> | Zofall, M. Science, 2012 |
| II         | 1869000 | 1873000 | <i>Island 13</i> | Zofall, M. Science, 2012 |
| II         | 2199000 | 2202000 | <i>Island 14</i> | Zofall, M. Science, 2012 |
| II         | 2338000 | 2342000 | <i>Island 15</i> | Zofall, M. Science, 2012 |
| II         | 3628000 | 3631000 | <i>Island 16</i> | Zofall, M. Science, 2012 |
| II         | 3640000 | 3642000 | <i>Island 17</i> | Zofall, M. Science, 2012 |
| III        | 958000  | 968000  | <i>Island 18</i> | Zofall, M. Science, 2012 |

|     |         |         |                  |                           |
|-----|---------|---------|------------------|---------------------------|
| III | 1036000 | 1040000 | <i>Island 19</i> | Zofall, M. Science, 2012  |
| III | 2369000 | 2371000 | <i>Island 20</i> | Zofall, M. Science, 2012  |
| III | 2422000 | 2424000 | <i>Island 21</i> | Zofall, M. Science, 2012  |
|     |         |         |                  |                           |
|     |         |         |                  |                           |
| I   | 1465847 | 1469848 | <i>HOOD-1</i>    | Yamanaka, S. Nature, 2013 |
| I   | 1564163 | 1568414 | <i>HOOD-2</i>    | Yamanaka, S. Nature, 2013 |
| I   | 2544835 | 2561773 | <i>HOOD-3</i>    | Yamanaka, S. Nature, 2013 |
| I   | 2927156 | 2941954 | <i>HOOD-4</i>    | Yamanaka, S. Nature, 2013 |
| I   | 2977013 | 2988899 | <i>HOOD-5</i>    | Yamanaka, S. Nature, 2013 |
| I   | 2994807 | 3009469 | <i>HOOD-6</i>    | Yamanaka, S. Nature, 2013 |
| I   | 3361499 | 3365727 | <i>HOOD-7</i>    | Yamanaka, S. Nature, 2013 |
| I   | 3736902 | 3743575 | <i>HOOD-8</i>    | Yamanaka, S. Nature, 2013 |
| I   | 3791825 | 3796114 | <i>HOOD-9</i>    | Yamanaka, S. Nature, 2013 |
| I   | 3996353 | 4000615 | <i>HOOD-10</i>   | Yamanaka, S. Nature, 2013 |
| I   | 4022326 | 4026545 | <i>HOOD-11</i>   | Yamanaka, S. Nature, 2013 |
| I   | 5069824 | 5083205 | <i>HOOD-12</i>   | Yamanaka, S. Nature, 2013 |
| I   | 5191103 | 5195325 | <i>HOOD-13</i>   | Yamanaka, S. Nature, 2013 |
| I   | 5195656 | 5199909 | <i>HOOD-14</i>   | Yamanaka, S. Nature, 2013 |
| I   | 5234000 | 5250176 | <i>HOOD-15</i>   | Yamanaka, S. Nature, 2013 |
| II  | 91600   | 101684  | <i>HOOD-16</i>   | Yamanaka, S. Nature, 2013 |
| II  | 347505  | 354250  | <i>HOOD-17</i>   | Yamanaka, S. Nature, 2013 |
| II  | 898107  | 902233  | <i>HOOD-18</i>   | Yamanaka, S. Nature, 2013 |
| II  | 1812684 | 1816937 | <i>HOOD-19</i>   | Yamanaka, S. Nature, 2013 |
| II  | 1965175 | 1969519 | <i>HOOD-20</i>   | Yamanaka, S. Nature, 2013 |
| II  | 2126590 | 2128479 | <i>HOOD-21</i>   | Yamanaka, S. Nature, 2013 |
| II  | 4414469 | 4418768 | <i>HOOD-22</i>   | Yamanaka, S. Nature, 2013 |
| II  | 4442538 | 4449562 | <i>HOOD-23</i>   | Yamanaka, S. Nature, 2013 |
| III | 173841  | 176400  | <i>HOOD-24</i>   | Yamanaka, S. Nature, 2013 |
| III | 254411  | 256353  | <i>HOOD-25</i>   | Yamanaka, S. Nature, 2013 |
| III | 778123  | 782331  | <i>HOOD-26</i>   | Yamanaka, S. Nature, 2013 |
| III | 1047657 | 1056145 | <i>HOOD-27</i>   | Yamanaka, S. Nature, 2013 |
| III | 1168500 | 1176000 | <i>HOOD-28</i>   | Yamanaka, S. Nature, 2013 |
| III | 1179500 | 1182650 | <i>HOOD-29</i>   | Yamanaka, S. Nature, 2013 |
| III | 1196050 | 1196500 | <i>HOOD-30</i>   | Yamanaka, S. Nature, 2013 |
| III | 1763512 | 1775613 | <i>HOOD-31</i>   | Yamanaka, S. Nature, 2013 |
| III | 2320230 | 2324503 | <i>HOOD-32</i>   | Yamanaka, S. Nature, 2013 |
