# Supplementary material for: Polymerase pausing induced by sequence-specific RNA-binding protein drives heterochromatin assembly
Source: PubMed Central journal article supplement (PMC6075038; doi:10.1101/gad.310136.117), 2018-07-01
Supplement: supp_32.13-14.953_Supplemental_Table_S7.pdf [file supp_32.13-14.953_Supplemental_Table_S7.pdf]

**Supplemental Table S7. Table of data sets used in this study and associated GEO accession numbers**

All data can be found under GEO SuperSeries **GSE114540**

| Sample | Data Set                                                    | Strain | Derived from | GEO accession |
|--------|-------------------------------------------------------------|--------|--------------|---------------|
| 1      | Seb1 PAR-CLIP Replicate 1                                   | PM2359 |              | GSM3143773    |
| 2      | Seb1 PAR-CLIP Replicate 2                                   | PM2359 |              | GSM3143774    |
| 3      | NET-seq <i>clr4</i> Δ Replicate 1                           | PM2366 |              | GSM3143767    |
| 4      | NET-seq <i>clr4</i> Δ Replicate 2                           | PM2366 |              | GSM3143768    |
| 5      | NET-seq <i>clr4</i> Δ <i>seb1-1</i> Replicate 1             | PM2368 |              | GSM3143771    |
| 6      | NET-seq <i>clr4</i> Δ <i>seb1-1</i> Replicate 2             | PM2368 |              | GSM3143772    |
| 7      | NET-seq <i>clr4</i> Δ <i>tfs1</i> <sup>DN</sup> Replicate 1 | PM2369 |              | GSM3143769    |
| 8      | NET-seq <i>clr4</i> Δ <i>tfs1</i> <sup>DN</sup> Replicate 2 | PM2370 |              | GSM3143770    |
| 9      | RNA-seq WT Replicate 1                                      | PM06   |              | GSM3143775    |
| 10     | RNA-seq WT Replicate 2                                      | PM06   |              | GSM3143776    |
| 11     | RNA-seq <i>seb1-1</i> Replicate 1                           | PM1316 | PM06         | GSM3143781    |
| 12     | RNA-seq <i>seb1-1</i> Replicate 2                           | PM1316 | PM06         | GSM3143782    |
| 13     | RNA-seq <i>epe1</i> Δ Replicate 1                           | PM964  |              | GSM3143777    |
| 14     | RNA-seq <i>epe1</i> Δ Replicate 2                           | PM964  |              | GSM3143778    |
| 15     | RNA-seq <i>epe1</i> Δ <i>tfs1</i> <sup>DN</sup> Replicate 1 | PM2391 | PM964        | GSM3143779    |
| 16     | RNA-seq <i>epe1</i> Δ <i>tfs1</i> <sup>DN</sup> Replicate 2 | PM2391 | PM964        | GSM3143780    |
| 17     | ChIP-seq WCE (for samples 19, 22-32)                        |        |              | GSM3143703    |
| 18     | ChIP-seq WCE (for samples 20, 21, and 33)                   |        |              | GSM3143687    |
| 19     | ChIP-seq <i>epe1</i> Δ Parental 1 (for samples 22-32)       | PM964  |              | GSM3143691    |
| 20     | ChIP-seq <i>epe1</i> Δ Parental 2 (for samples 21 and 33)   | PM964  |              | GSM3143688    |
| 21     | ChIP-Seq <i>epe1</i> Δ <i>tfs1</i> <sup>DN</sup> Isolate 1  | PM2390 | PM964        | GSM3143689    |
| 22     | ChIP-Seq <i>epe1</i> Δ <i>tfs1</i> <sup>DN</sup> Isolate 2  | PM2391 | PM964        | GSM3143695    |
| 23     | ChIP-Seq <i>epe1</i> Δ <i>tfs1</i> <sup>DN</sup> Isolate 3  | PM2392 | PM964        | GSM3143696    |
| 24     | ChIP-Seq <i>epe1</i> Δ <i>tfs1</i> <sup>DN</sup> Isolate 4  | PM2393 | PM964        | GSM3143697    |
| 25     | ChIP-Seq <i>epe1</i> Δ <i>tfs1</i> <sup>DN</sup> Isolate 5  | PM2394 | PM964        | GSM3143698    |
| 26     | ChIP-Seq <i>epe1</i> Δ <i>tfs1</i> <sup>DN</sup> Isolate 6  | PM2395 | PM964        | GSM3143699    |
| 27     | ChIP-Seq <i>epe1</i> Δ <i>tfs1</i> <sup>DN</sup> Isolate 7  | PM2396 | PM964        | GSM3143700    |
| 28     | ChIP-Seq <i>epe1</i> Δ <i>tfs1</i> <sup>DN</sup> Isolate 8  | PM2397 | PM964        | GSM3143701    |
| 29     | ChIP-Seq <i>epe1</i> Δ <i>tfs1</i> <sup>DN</sup> Isolate 9  | PM2398 | PM964        | GSM3143702    |
| 30     | ChIP-Seq <i>epe1</i> Δ <i>tfs1</i> <sup>DN</sup> Isolate 10 | PM2399 | PM964        | GSM3143692    |
| 31     | ChIP-Seq <i>epe1</i> Δ <i>tfs1</i> <sup>DN</sup> Isolate 11 | PM2400 | PM964        | GSM3143693    |
| 32     | ChIP-Seq <i>epe1</i> Δ <i>tfs1</i> <sup>DN</sup> Isolate 12 | PM2401 | PM964        | GSM3143694    |
| 33     | ChIP-Seq <i>epe1</i> Δ <i>tfs1</i> <sup>DN</sup> Isolate 13 | PM2402 | PM964        | GSM3143690    |
| 34     | ChIP-seq WCE (for samples 35-50)                            |        |              | GSM3143742    |
| 35     | ChIP-seq <i>epe1</i> Δ Parental (for samples 36-50)         | PM964  |              | GSM3143743    |
| 36     | ChIP-seq <i>epe1</i> Δ vector control Isolate 1             | PM2371 | PM964        | GSM3143727    |
| 37     | ChIP-seq <i>epe1</i> Δ vector control Isolate 2             | PM2372 | PM964        | GSM3143734    |
| 38     | ChIP-seq <i>epe1</i> Δ vector control Isolate 3             | PM2373 | PM964        | GSM3143735    |
| 39     | ChIP-seq <i>epe1</i> Δ vector control Isolate 4             | PM2374 | PM964        | GSM3143736    |
| 40     | ChIP-seq <i>epe1</i> Δ vector control Isolate 5             | PM2375 | PM964        | GSM3143737    |
| 41     | ChIP-seq <i>epe1</i> Δ vector control Isolate 6             | PM2376 | PM964        | GSM3143738    |
| 42     | ChIP-seq <i>epe1</i> Δ vector control Isolate 7             | PM2377 | PM964        | GSM3143739    |
| 43     | ChIP-seq <i>epe1</i> Δ vector control Isolate 8             | PM2378 | PM964        | GSM3143740    |
| 44     | ChIP-seq <i>epe1</i> Δ vector control Isolate 9             | PM2379 | PM964        | GSM3143741    |
| 45     | ChIP-seq <i>epe1</i> Δ vector control Isolate 10            | PM2380 | PM964        | GSM3143728    |
| 46     | ChIP-seq <i>epe1</i> Δ vector control Isolate 11            | PM2381 | PM964        | GSM3143729    |

|    |                                                                           |        |        |            |
|----|---------------------------------------------------------------------------|--------|--------|------------|
| 47 | ChIP-seq <i>epe1</i> Δ vector control Isolate 12                          | PM2382 | PM964  | GSM3143730 |
| 48 | ChIP-seq <i>epe1</i> Δ vector control Isolate 13                          | PM2383 | PM964  | GSM3143731 |
| 49 | ChIP-seq <i>epe1</i> Δ vector control Isolate 14                          | PM2384 | PM964  | GSM3143732 |
| 50 | ChIP-seq <i>epe1</i> Δ vector control Isolate 15                          | PM2385 | PM964  | GSM3143733 |
| 51 | ChIP-seq WCE (for samples 54, 58, 62, 63)                                 |        |        | GSM3143704 |
| 52 | ChIP-seq WCE (for samples 55, 57, 60, 64, 65, 66)                         |        |        | GSM3143709 |
| 53 | ChIP-seq WCE (for samples 56, 59, 61, 67, 68)                             |        |        | GSM3143716 |
| 54 | ChIP-seq <i>epe1</i> Δ <i>ago1</i> Δ Parental 1                           | PM2403 | PM964  | GSM3143705 |
| 55 | ChIP-seq <i>epe1</i> Δ <i>ago1</i> Δ Parental 2                           | PM2404 | PM964  | GSM3143710 |
| 56 | ChIP-seq <i>epe1</i> Δ <i>ago1</i> Δ Parental 3                           | PM2405 | PM964  | GSM3143717 |
| 57 | ChIP-seq <i>epe1</i> Δ <i>ago1</i> Δ <i>tfs1</i> <sup>DN</sup> Isolate 1  | PM2406 | PM2404 | GSM3143711 |
| 58 | ChIP-seq <i>epe1</i> Δ <i>ago1</i> Δ <i>tfs1</i> <sup>DN</sup> Isolate 2  | PM2407 | PM2403 | GSM3143706 |
| 59 | ChIP-seq <i>epe1</i> Δ <i>ago1</i> Δ <i>tfs1</i> <sup>DN</sup> Isolate 3  | PM2408 | PM2405 | GSM3143720 |
| 60 | ChIP-seq <i>epe1</i> Δ <i>ago1</i> Δ <i>tfs1</i> <sup>DN</sup> Isolate 4  | PM2409 | PM2404 | GSM3143713 |
| 61 | ChIP-seq <i>epe1</i> Δ <i>ago1</i> Δ <i>tfs1</i> <sup>DN</sup> Isolate 5  | PM2410 | PM2405 | GSM3143721 |
| 62 | ChIP-seq <i>epe1</i> Δ <i>ago1</i> Δ <i>tfs1</i> <sup>DN</sup> Isolate 6  | PM2411 | PM2403 | GSM3143707 |
| 63 | ChIP-seq <i>epe1</i> Δ <i>ago1</i> Δ <i>tfs1</i> <sup>DN</sup> Isolate 7  | PM2412 | PM2403 | GSM3143708 |
| 64 | ChIP-seq <i>epe1</i> Δ <i>ago1</i> Δ <i>tfs1</i> <sup>DN</sup> Isolate 8  | PM2413 | PM2404 | GSM3143714 |
| 65 | ChIP-seq <i>epe1</i> Δ <i>ago1</i> Δ <i>tfs1</i> <sup>DN</sup> Isolate 9  | PM2414 | PM2404 | GSM3143715 |
| 66 | ChIP-seq <i>epe1</i> Δ <i>ago1</i> Δ <i>tfs1</i> <sup>DN</sup> Isolate 10 | PM2415 | PM2404 | GSM3143712 |
| 67 | ChIP-seq <i>epe1</i> Δ <i>ago1</i> Δ <i>tfs1</i> <sup>DN</sup> Isolate 11 | PM2416 | PM2405 | GSM3143718 |
| 68 | ChIP-seq <i>epe1</i> Δ <i>ago1</i> Δ <i>tfs1</i> <sup>DN</sup> Isolate 12 | PM2417 | PM2405 | GSM3143719 |
| 69 | ChIP-seq WCE (for samples 70-85)                                          |        |        | GSM3143760 |
| 70 | ChIP-seq <i>seb1-1 epe1</i> Δ                                             | PM2418 |        | GSM3143744 |
| 71 | ChIP-seq <i>seb1-1 epe1</i> Δ <i>tfs1</i> <sup>DN</sup> Isolate 1         | PM2419 | PM2418 | GSM3143745 |
| 72 | ChIP-seq <i>seb1-1 epe1</i> Δ <i>tfs1</i> <sup>DN</sup> Isolate 2         | PM2420 | PM2418 | GSM3143752 |
| 73 | ChIP-seq <i>seb1-1 epe1</i> Δ <i>tfs1</i> <sup>DN</sup> Isolate 3         | PM2421 | PM2418 | GSM3143753 |
| 74 | ChIP-seq <i>seb1-1 epe1</i> Δ <i>tfs1</i> <sup>DN</sup> Isolate 4         | PM2422 | PM2418 | GSM3143754 |
| 75 | ChIP-seq <i>seb1-1 epe1</i> Δ <i>tfs1</i> <sup>DN</sup> Isolate 5         | PM2423 | PM2418 | GSM3143755 |
| 76 | ChIP-seq <i>seb1-1 epe1</i> Δ <i>tfs1</i> <sup>DN</sup> Isolate 6         | PM2424 | PM2418 | GSM3143756 |
| 77 | ChIP-seq <i>seb1-1 epe1</i> Δ <i>tfs1</i> <sup>DN</sup> Isolate 7         | PM2425 | PM2418 | GSM3143757 |
| 78 | ChIP-seq <i>seb1-1 epe1</i> Δ <i>tfs1</i> <sup>DN</sup> Isolate 8         | PM2426 | PM2418 | GSM3143758 |
| 79 | ChIP-seq <i>seb1-1 epe1</i> Δ <i>tfs1</i> <sup>DN</sup> Isolate 9         | PM2427 | PM2418 | GSM3143759 |
| 80 | ChIP-seq <i>seb1-1 epe1</i> Δ <i>tfs1</i> <sup>DN</sup> Isolate 10        | PM2428 | PM2418 | GSM3143746 |
| 81 | ChIP-seq <i>seb1-1 epe1</i> Δ <i>tfs1</i> <sup>DN</sup> Isolate 11        | PM2429 | PM2418 | GSM3143747 |
| 82 | ChIP-seq <i>seb1-1 epe1</i> Δ <i>tfs1</i> <sup>DN</sup> Isolate 12        | PM2430 | PM2418 | GSM3143748 |
| 83 | ChIP-seq <i>seb1-1 epe1</i> Δ <i>tfs1</i> <sup>DN</sup> Isolate 13        | PM2431 | PM2418 | GSM3143749 |
| 84 | ChIP-seq <i>seb1-1 epe1</i> Δ <i>tfs1</i> <sup>DN</sup> Isolate 14        | PM2432 | PM2418 | GSM3143750 |
| 85 | ChIP-seq <i>seb1-1 epe1</i> Δ <i>tfs1</i> <sup>DN</sup> Isolate 15        | PM2433 | PM2418 | GSM3143751 |
| 86 | ChIP-seq WCE (for samples 87-88)                                          |        |        | GSM3143762 |
| 87 | ChIP-seq <i>pfs2+</i> Parent replicate 1                                  | PM2434 |        | GSM3143763 |
| 88 | ChIP-seq <i>pfs2-11</i> replicate 1                                       | PM2435 | PM2434 | GSM3143761 |
| 89 | ChIP-Seq WCE (fro samples 90-91)                                          |        |        | GSM3143765 |
| 90 | ChIP-seq <i>pfs2+</i> Parent replicate 2                                  | PM2434 |        | GSM3143766 |
| 91 | ChIP-seq <i>pfs2-11</i> replicate 2                                       | PM2435 | PM2434 | GSM3143764 |
| 92 | RNAPII ChIP-seq WCE (for samples 93-96)                                   |        |        | GSM3143726 |
| 93 | RNAPII ChIP-seq <i>clr4</i> Δ replicate 1                                 | PM2366 |        | GSM3143722 |
| 94 | RNAPII ChIP-seq <i>clr4</i> Δ replicate 2                                 | PM2366 |        | GSM3143723 |
| 95 | RNAPII ChIP-seq <i>clr4</i> Δ <i>seb1-1</i> replicate 1                   | PM2368 | PM2366 | GSM3143724 |
| 96 | RNAPII ChIP-seq <i>clr4</i> Δ <i>seb1-1</i> replicate 2                   | PM2368 | PM2366 | GSM3143725 |
