# Supplementary material for: Polymerase pausing induced by sequence-specific RNA-binding protein drives heterochromatin assembly
Source: Genes Dev. 2018 Jul 1;32(13-14):953–64. doi: 10.1101/gad.310136.117 (PMC6075038; doi:10.1101/gad.310136.117)
Supplement: Supplemental Material [file supp_32.13-14.953_Supplemental_Fig_S11.pdf]

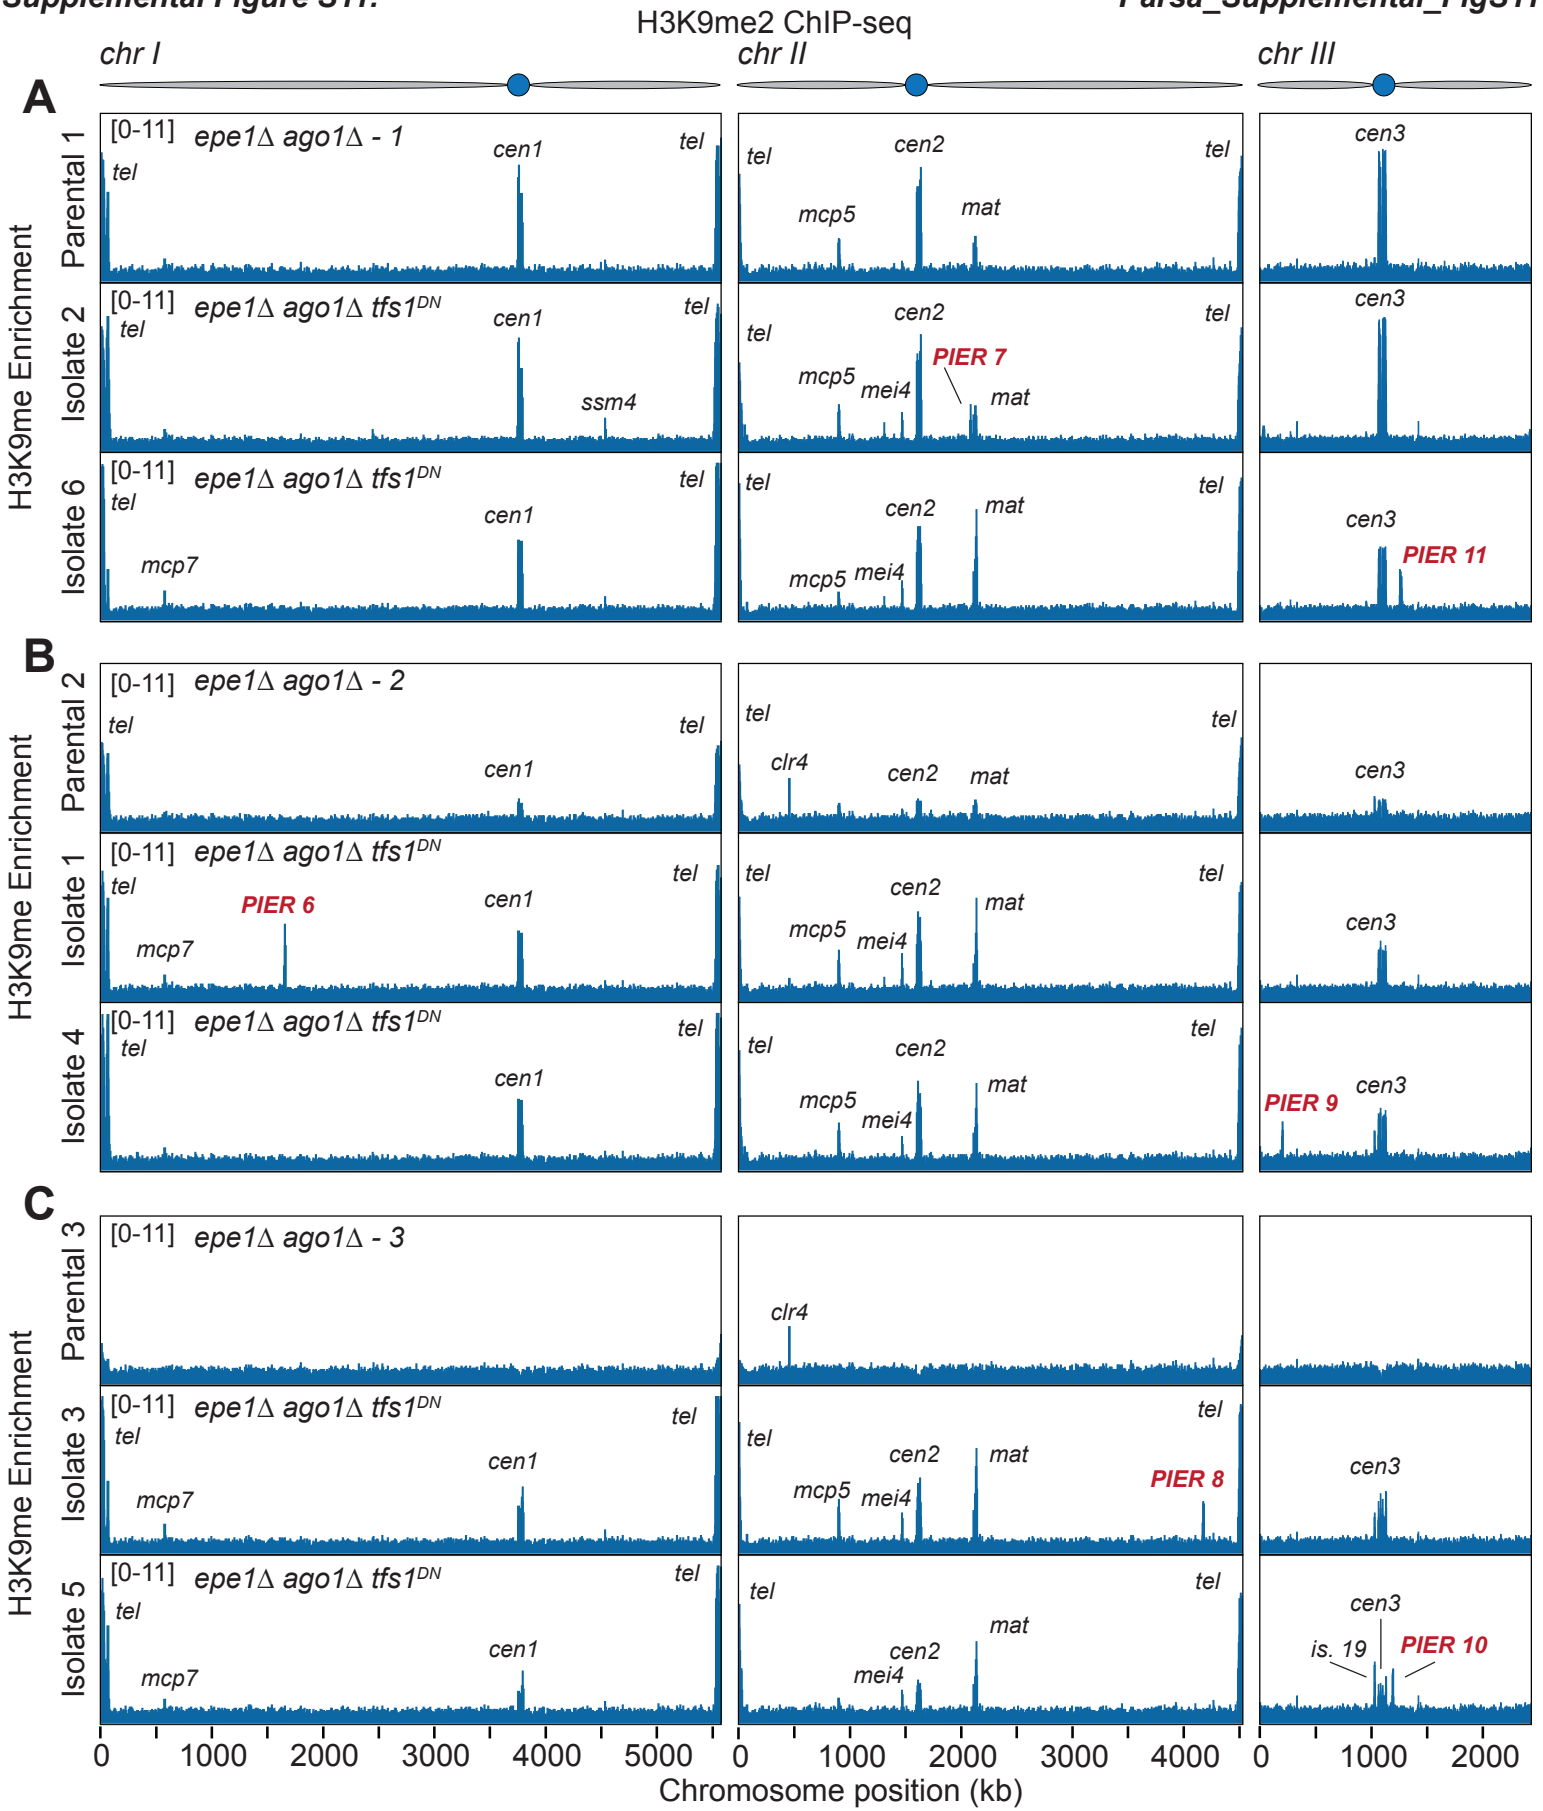

**Supplemental Figure S11. PIER formation is RNAi-independent and expression of TFIIIS<sup>DN</sup> can rescue the adaptive silencing of *clr4*<sup>+</sup> observed in *epe1*Δ *ago1*Δ strains. A-C)** Genome wide plots of H3K9me2 enrichment. **A)** Parental (*epe1*Δ *ago1*Δ-1) and two independent isolates of *epe1*Δ *ago1*Δ *tfs1*<sup>DN</sup> derived from this parental are plotted depicting PIERs 7 and 11. **B)** Parental (*epe1*Δ *ago1*Δ-2), initially harboring H3K9me2 at *clr4*<sup>+</sup>, and two independent isolates of *epe1*Δ *ago1*Δ *tfs1*<sup>DN</sup> derived from this parental are plotted depicting PIERs 6 and 9. **C)** Parental (*epe1*Δ *ago1*Δ-3), initially harboring H3K9me2 at *clr4*<sup>+</sup>, and two independent isolates of *epe1*Δ *ago1*Δ *tfs1*<sup>DN</sup> derived from this parental are plotted depicting PIERs 8 and 10.
